# Supplementary material for: Synthesis and characterization of homometallic cobalt complexes with metal–metal interactions
Source: Royal Society of Chemistry journal article supplement (doi:10.1039/d4dt01301h), 2024-01-01
Supplement: d4dt01301h1.pdf [file d4dt01301h1.pdf]

Supplementary Information

for

**Synthesis and Characterization of Homometallic Cobalt Complexes  
with Metal-Metal Interactions**

Xiaoqing Xin,<sup>a\*</sup> Weiming Sheng,<sup>b</sup> Qian Zhang,<sup>c</sup> Ruogu Qi,<sup>a\*</sup> Qin Zhu,<sup>b,d\*</sup> and Congqing  
Zhu<sup>b\*</sup>

<sup>a</sup> *School of Medicine, Nanjing University of Chinese Medicine, Nanjing 210023, China*

<sup>b</sup> *State Key Laboratory of Coordination Chemistry, Jiangsu Key Laboratory of Advanced Organic Materials, School of Chemistry and Chemical Engineering, Nanjing University, Nanjing 210023, China*

<sup>c</sup> *College of Science, Nanjing Forestry University, Nanjing 210037, China*

<sup>d</sup> *Key Laboratory for Organic Electronics & Information Displays (KLOEID) and Institute of Advanced Materials (IAM), SICAM, Nanjing University of Posts & Telecommunications, Nanjing 210023, China*

**Contents**

|                                                |           |
|------------------------------------------------|-----------|
| <b>1. Experimental Procedure.....</b>          | <b>2</b>  |
| <b>2. Supplementary Figures.....</b>           | <b>8</b>  |
| <b>3. X-ray Crystallographic Analysis.....</b> | <b>16</b> |
| <b>4. Theoretical Calculations.....</b>        | <b>28</b> |
| <b>5. References.....</b>                      | <b>49</b> |

---

## 1. Experimental Procedure

**General Procedure:** All manipulations were performed under an atmosphere of nitrogen using standard Schlenk techniques or in a glovebox. Commercially available chemicals were used as received without further purification. The solvents were obtained by passing through a Solve Purer G5 (MIKROUNA) solvent purification system and further dried over 4 Å molecular sieves. C<sub>6</sub>D<sub>6</sub> and THF-d<sub>8</sub> were dried over Na/K and stored under N<sub>2</sub> atmosphere prior to use. Nuclear magnetic resonance spectroscopy was performed using a Bruker AVIII-400 (<sup>1</sup>H 400 MHz) or a Bruker AVIII-500 (<sup>1</sup>H 500 MHz; <sup>13</sup>C{<sup>1</sup>H} 125 MHz) spectrometer at room temperature (RT). The <sup>1</sup>H and <sup>13</sup>C{<sup>1</sup>H} NMR chemical shifts (δ) are relative to tetramethylsilane. Absolute values of the coupling constants are provided in Hertz (Hz). Multiplicities are abbreviated as singlet (s), doublet (d), triplet (t) and multiplet (m). Absorption spectra were measured on a Lambda 750 spectrometer at room temperature. Fourier transform infrared spectra (FT-IR) were measured on a Nicolet FT-IR 170X spectrophotometer in the range of 4000-400 cm<sup>-1</sup> at 25 °C using KBr plates. Magnetic susceptibility measurements on crystalline samples were performed using a Quantum Design SQUID VSM magnetometer from 300 to 2 K under an external magnetic field of 1000 Oe. Elemental analyses (C, H, N) were performed on a Vario MICRO elemental analyzer at the Center of Modern Analysis, Nanjing University.

### Synthesis of compound 1.

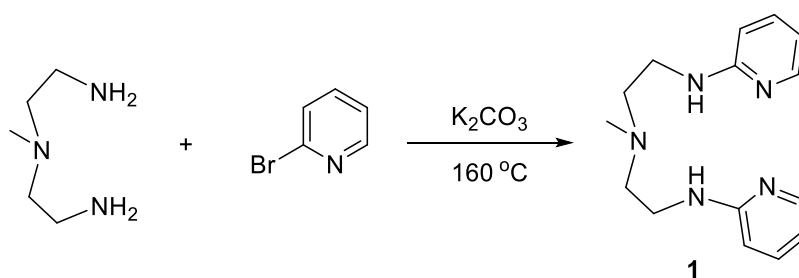

Two equivalents of  $K_2CO_3$  (2.76 g, 20.0 mmol) was added to a solution of  $CH_3N(CH_2CH_2NH_2)_2$  (1.17 g, 10.0 mmol, 1 equiv.) and 2-bromopyridine (3.16 g, 20.0 mmol, 2 equiv.). The reaction mixture was sealed in a Schlenk flask and stirred at 160 °C for 2 days, and subsequently purified by column chromatography (petroleum ether: ethyl acetate:  $CH_3OH = 1 : 10 : 0.1$ ) to give compound **1** as a pale yellow oil (The reaction was performed without solvent.). Yield: 1.68 g (62%).  $^1H$  NMR ( $CDCl_3$ , 500 MHz, 298K)  $\delta$  8.06-8.07 (m, 2H,  $C_5H_4N$ ), 7.35-7.39 (m, 2H,  $C_5H_4N$ ), 6.53-6.55 (m, 2H,  $C_5H_4N$ ), 6.37 (d,  $^3J_{HH} = 8.5$  Hz, 2H,  $C_5H_4NCH_2$ ), 5.06 (s, 2H, NH), 3.35 (dd,  $^3J_{HH} = 11.0$  Hz, 6.0 Hz, 4H,  $NCH_2CH_2$ ), 2.66 (t,  $^3J_{HH} = 6.0$  Hz, 4H,  $NCH_2CH_2$ ), 2.29 (s, 3H,  $NCH_3$ ).  $^{13}C\{^1H\}$  NMR ( $CDCl_3$ , 125 MHz, 298K)  $\delta$  158.8 ( $C_5H_4N$ ), 148.0 ( $C_5H_4N$ ), 137.3 ( $C_5H_4N$ ), 112.7 ( $C_5H_4N$ ), 107.3 ( $C_5H_4N$ ), 56.2 ( $NCH_2CH_2$ ), 41.6 ( $NCH_2CH_2$ ), 39.4 ( $(CH_3)N$ ). HRMS (ESI-TOF) calcd for  $C_{15}H_{21}N_5$   $[M+H]^+$  272.1870, found 272.1864.

### Synthesis of complex **2**.

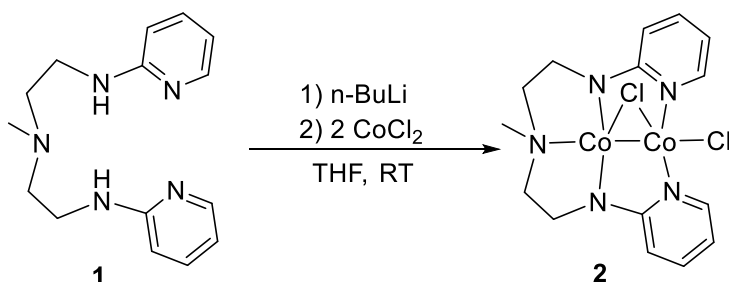

A 2.4 M solution of  $n\text{-BuLi}$  in hexanes (0.25 mL, 0.6 mmol) was added dropwise to a solution of compound **1** (81 mg, 0.3 mmol) in THF (20 mL) at room temperature. The mixture was stirred for 2 h, and was then added to the suspension of  $CoCl_2$  (78 mg, 0.6 mmol) in THF (10 mL). After stirring overnight at RT, the mixture was filtered through a sintered glass funnel and the filtrate was concentrated to 1 mL. After the concentrated solution was placed at -30 °C for 24 h, a green solid was afforded (96 mg, 70%). Green crystals of **2** suitable for X-ray diffraction were obtained by placing the concentrated toluene solution at -30 °C for 24 h.  $^1H$  NMR ( $C_6D_6$ , 400 MHz, 298K)  $\delta$  22.86, 11.87, 5.65, 2.10, 1.35, 1.23, 0.29 (The complex **2** exhibits poor solubility in common deuterated solvents, the characteristic peaks shown in the  $^1H$  NMR spectrum were extracted based

on the *in-situ* reaction between lithiated **1** and CoCl<sub>2</sub> in THF-d<sub>8</sub>). FTIR  $\nu/\text{cm}^{-1}$  (KBr): 3025 (w, C-H<sub>Ar</sub>), 2963 (w), 2853 (m), 2812 (m), 1608 (s, C=N), 1539 (m, C=C), 1494 (s), 1438 (s), 1373 (m), 1343 (m), 1296 (m), 1246 (w), 1161 (m), 1125 (w), 1072 (w), 1003 (m), 918 (w), 822 (w), 765 (m), 729 (m), 644 (m), 515 (w, Co-N). Anal. Calcd. For C<sub>15</sub>H<sub>19</sub>Cl<sub>2</sub>Co<sub>2</sub>N<sub>5</sub>: C 39.33; H 4.18; N 15.29. Found: C 39.43; H 4.56; N 15.49.

### Synthesis of complex **3**.

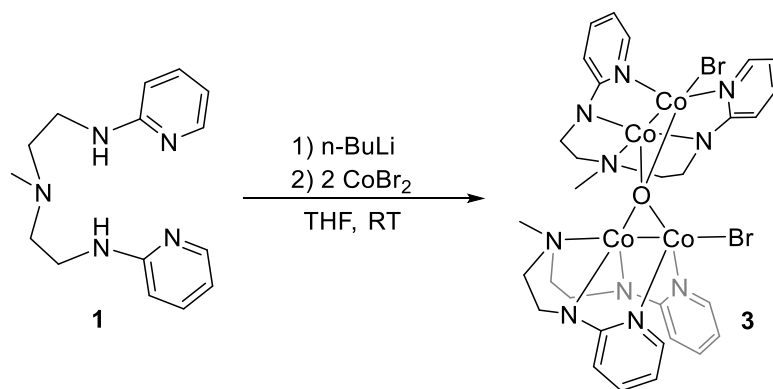

A 2.4 M solution of *n*-BuLi in hexanes (0.25 mL, 0.6 mmol) was added dropwise to a solution of compound **1** (81 mg, 0.3 mmol) in THF (20 mL) at room temperature. The mixture was stirred for 2 h, and was then added to the suspension of CoBr<sub>2</sub> (131 mg, 0.6 mmol) in THF (10 mL). After stirring overnight at RT, the mixture was filtered through a sintered glass funnel and the filtrate was concentrated to 1 mL. After the concentrated solution was placed at -30 °C for 24 h, green-brown crystals of **3** suitable for X-ray diffraction were obtained (88 mg, 61%). <sup>1</sup>H NMR (THF-d<sub>8</sub>, 400 MHz, 298K)  $\delta$  72.48, 70.05, 60.40, 59.60, 58.86, 56.46, 55.31, 43.98, 22.77, 21.61, 19.83, 19.25, 13.01, 11.89, 8.39, 7.20, -1.13 (The complex **3** exhibits poor solubility in common deuterated solvents, the characteristic peaks shown in the <sup>1</sup>H NMR spectrum were extracted based on the *in-situ* reaction between lithiated **1** and CoBr<sub>2</sub> in THF-d<sub>8</sub>). FTIR  $\nu/\text{cm}^{-1}$  (KBr): 3025 (w, C-H<sub>Ar</sub>), 2962 (w), 2906 (w), 2856 (m), 1607 (s, C=N), 1537 (m, C=C), 1491 (s), 1437 (s), 1344 (m), 1296 (m), 1249 (m), 1160 (m), 1125 (w), 1001 (m), 918 (w), 856 (w), 818 (w), 764 (m), 730 (m), 637 (m), 515 (w, Co-N). Anal. Calcd. For C<sub>30</sub>H<sub>38</sub>Br<sub>2</sub>Co<sub>4</sub>N<sub>10</sub>O·THF: C 39.94; H 4.54; N 13.70. Found: C

41.03; H 4.53; N 13.61.

#### Synthesis of complex **4**.

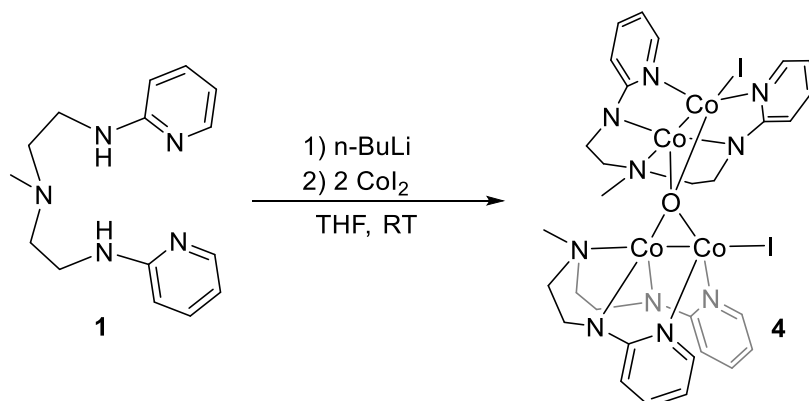

A 2.4 M solution of *n*-BuLi in hexanes (0.25 mL, 0.6 mmol) was added dropwise to a solution of compound **1** (81 mg, 0.3 mmol) in THF (20 mL) at room temperature. The mixture was stirred for 2 h, and was then added to the suspension of CoI<sub>2</sub> (188 mg, 0.6 mmol) in THF (10 mL). After stirring overnight at RT, the mixture was filtered through a sintered glass funnel and the filtrate was concentrated to 1 mL. After the concentrated solution was placed at -30 °C for 24 h, red-brown crystals were collected (83 mg, 53%). Red-brown crystals of **4** suitable for X-ray diffraction were obtained by placing the concentrated toluene solution at -30 °C for 24 h. <sup>1</sup>H NMR (THF-d<sub>8</sub>, 400 MHz, 298K) δ 78.13, 61.93, 61.56, 58.25, 57.55, 24.96, 24.58, 22.76, 20.63, 13.88, 12.46, 10.51, 7.78, 6.75, 5.76, 5.64, -2.31 (The complex **4** exhibits poor solubility in common deuterated solvents, the characteristic peaks shown in the <sup>1</sup>H NMR spectrum were extracted based on the *in-situ* reaction between lithiated **1** and CoI<sub>2</sub> in THF-d<sub>8</sub>). FTIR ν/cm<sup>-1</sup> (KBr): 3023 (w, C-H<sub>Ar</sub>), 2902 (w), 2855 (m), 1607 (s, C=N), 1536 (m, C=C), 1491 (s), 1436 (s), 1344 (m), 1294 (m), 1247 (m), 1161 (m), 1126 (m), 1075 (w), 1000 (m), 919 (w), 855 (w), 820 (w), 763 (m), 729 (m), 631 (m), 515 (w, Co-N). Anal. Calcd. For C<sub>30</sub>H<sub>38</sub>Co<sub>4</sub>I<sub>2</sub>N<sub>10</sub>O·Toluene: C 39.11; H 4.08; N 12.33. Found: C 39.31; H 4.13; N 12.10.

### Synthesis of complex 5.

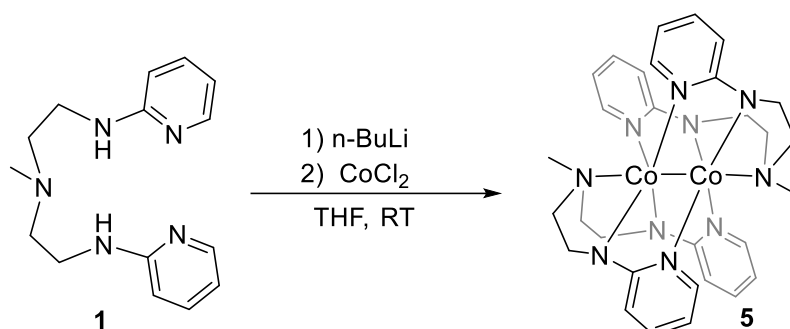

A 2.4 M solution of *n*-BuLi in hexanes (0.25 mL, 0.6 mmol) was added dropwise to a solution of compound **1** (81 mg, 0.3 mmol) in THF (20 mL) at room temperature. The mixture was stirred for 2 h, and was then added to the suspension of CoCl<sub>2</sub> (39 mg, 0.3 mmol) in THF (10 mL). After stirring overnight at RT, the mixture was filtered through a sintered glass funnel and the filtrate was concentrated to 1 mL. After the concentrated solution was placed at -30 °C for 24 h, a yellow-green solid was afforded (57 mg, 58%). Green crystals of **5** suitable for X-ray diffraction were obtained by placing the concentrated toluene solution at -30 °C for 24 h. <sup>1</sup>H NMR (THF-*d*<sub>8</sub>, 400 MHz, 298K) δ 7.76-7.78 (m, 2H, C<sub>5</sub>H<sub>4</sub>N), 6.73 (t, <sup>3</sup>J<sub>HH</sub>= 8.0 Hz, 2H, C<sub>5</sub>H<sub>4</sub>N), 5.76 (t, <sup>3</sup>J<sub>HH</sub>= 6.0 Hz, 2H, C<sub>5</sub>H<sub>4</sub>N), 5.63 (d, <sup>3</sup>J<sub>HH</sub>= 8.8 Hz, 2H, C<sub>5</sub>H<sub>4</sub>N), 2.97 (s, 3H, NCH<sub>3</sub>), 2.82-2.88 (m, 2H, NCH<sub>2</sub>CH<sub>2</sub>), 2.73-2.80 (m, 2H, NCH<sub>2</sub>CH<sub>2</sub>), 2.61-2.67 (m, 2H, NCH<sub>2</sub>CH<sub>2</sub>), 2.34-2.40 (m, 2H, NCH<sub>2</sub>CH<sub>2</sub>) (The complex **5** exhibits poor solubility in common deuterated solvents, the characteristic peaks shown in the <sup>1</sup>H NMR spectrum were extracted based on the *in-situ* reaction between lithiated **1** and CoCl<sub>2</sub> in THF-*d*<sub>8</sub>, tentative assignments based on relative integration.). FTIR  $\nu/\text{cm}^{-1}$  (KBr): 3078 (w, C-H<sub>Ar</sub>), 3020 (w, C-H<sub>Ar</sub>), 2971 (w), 2895 (w), 2848 (m), 2793 (m), 1912 (w), 1862 (w), 1761 (w), 1607 (s, C=N), 1528 (s, C=C), 1446 (s), 1354 (m), 1291 (s), 1249 (m), 1158 (m), 1123 (m), 1090 (w), 1047 (w), 1011 (m), 939 (w), 906 (w), 856 (w), 803 (m), 744 (m), 718 (m), 647 (m), 521 (m, Co-N), 438 (w). Anal. Calcd. For C<sub>30</sub>H<sub>38</sub>Co<sub>2</sub>N<sub>10</sub>: C 54.88; H 5.83; N 21.33. Found: C 54.90; H 5.76; N 21.35.

---

**General procedures for the hydrosilylation of terminal alkynes catalyzed by complexes 2-5.**

In a N<sub>2</sub>-filled glovebox, the phenylacetylene (51 mg, 0.5 mmol), phenylsilane (54 mg, 0.5 mmol), Co complex (5 mol%), THF (1.0 mL) and a magnetic stirring bar were added to a 5-mL vial. The vial was sealed with a rubber septum and removed from the glovebox. The reaction mixture was stirred for 24 h at room temperature and then the solvent was removed under reduced pressure. The crude product was purified by column chromatography with petroleum ether as eluent.

## 2. Supplementary Figures

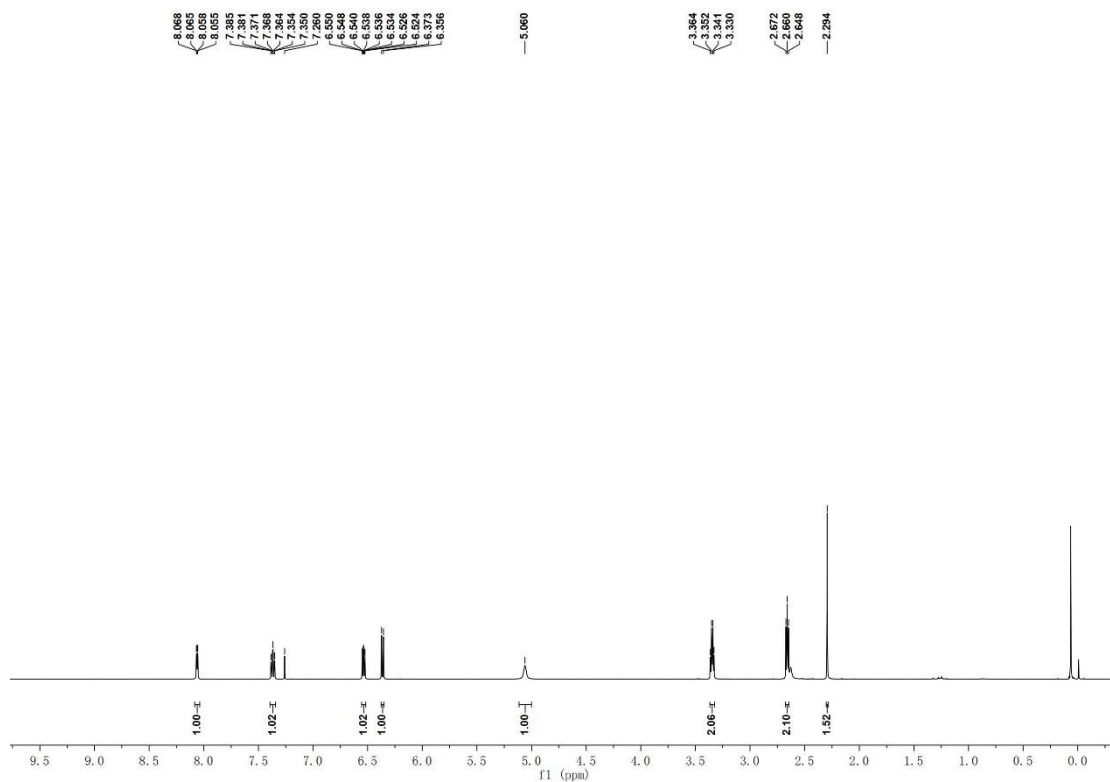

Figure S1. The  $^1\text{H}$  NMR (500 MHz,  $\text{CDCl}_3$ ) spectrum of compound **1**.

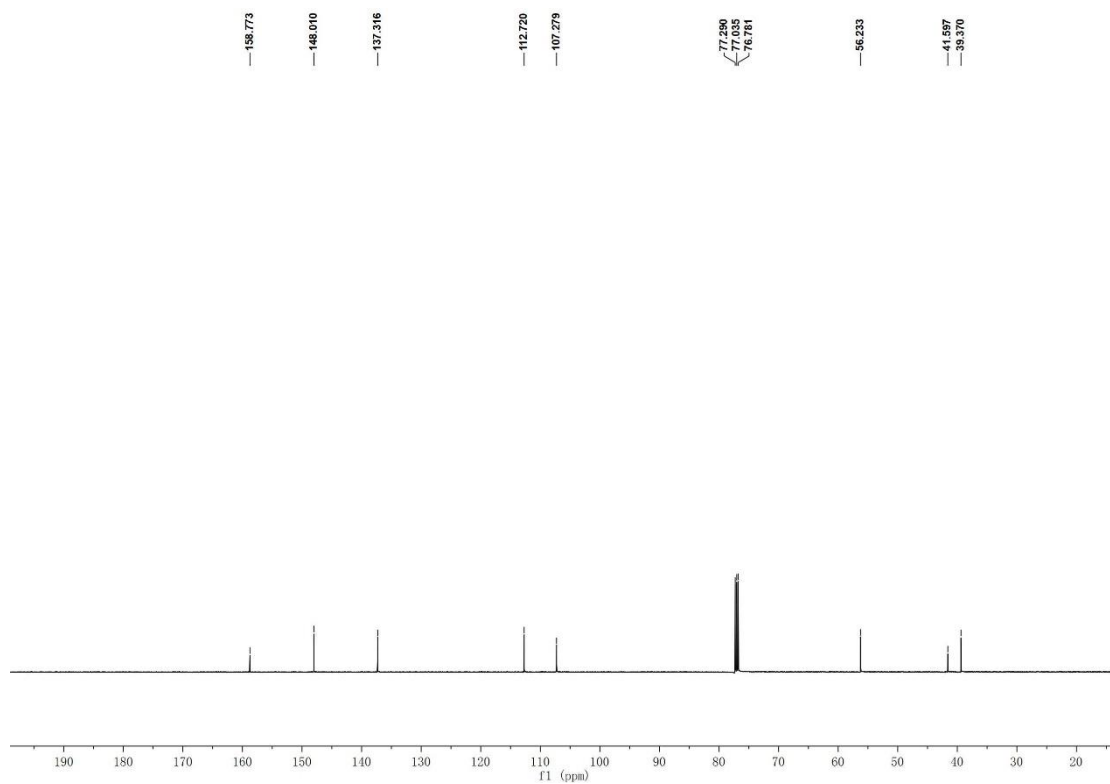

Figure S2. The  $^{13}\text{C}\{^1\text{H}\}$  NMR (125 MHz,  $\text{CDCl}_3$ ) spectrum of compound **1**.



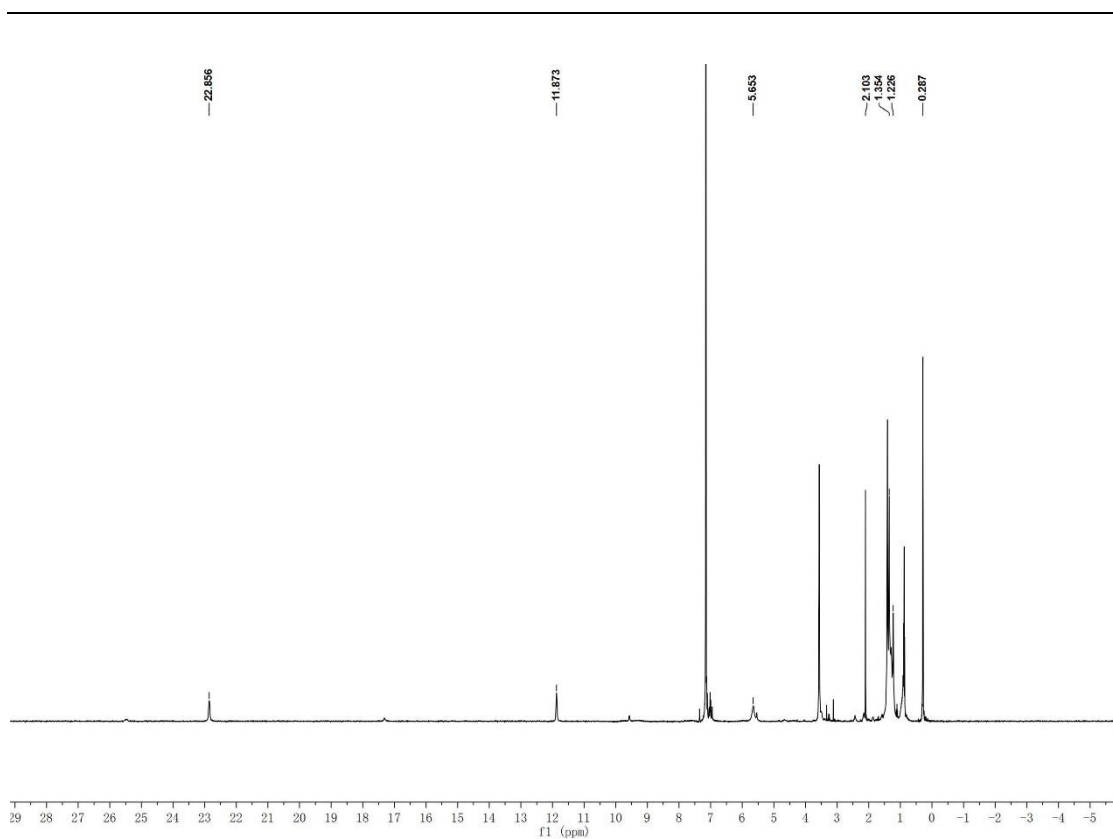

**Figure S3.** The  $^1\text{H}$  NMR (400 MHz,  $\text{C}_6\text{D}_6$ ) spectrum of complex **2**.

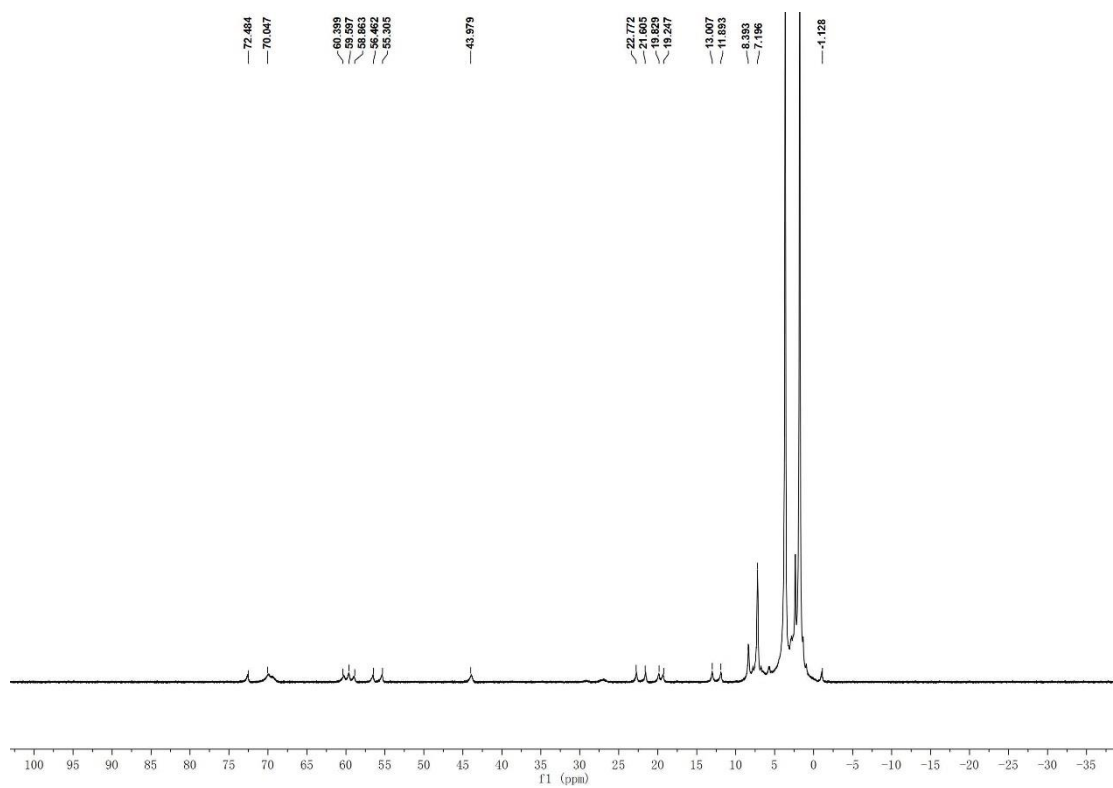

**Figure S4.** The  $^1\text{H}$  NMR (400 MHz,  $\text{THF-d}_8$ ) spectrum of complex **3**.

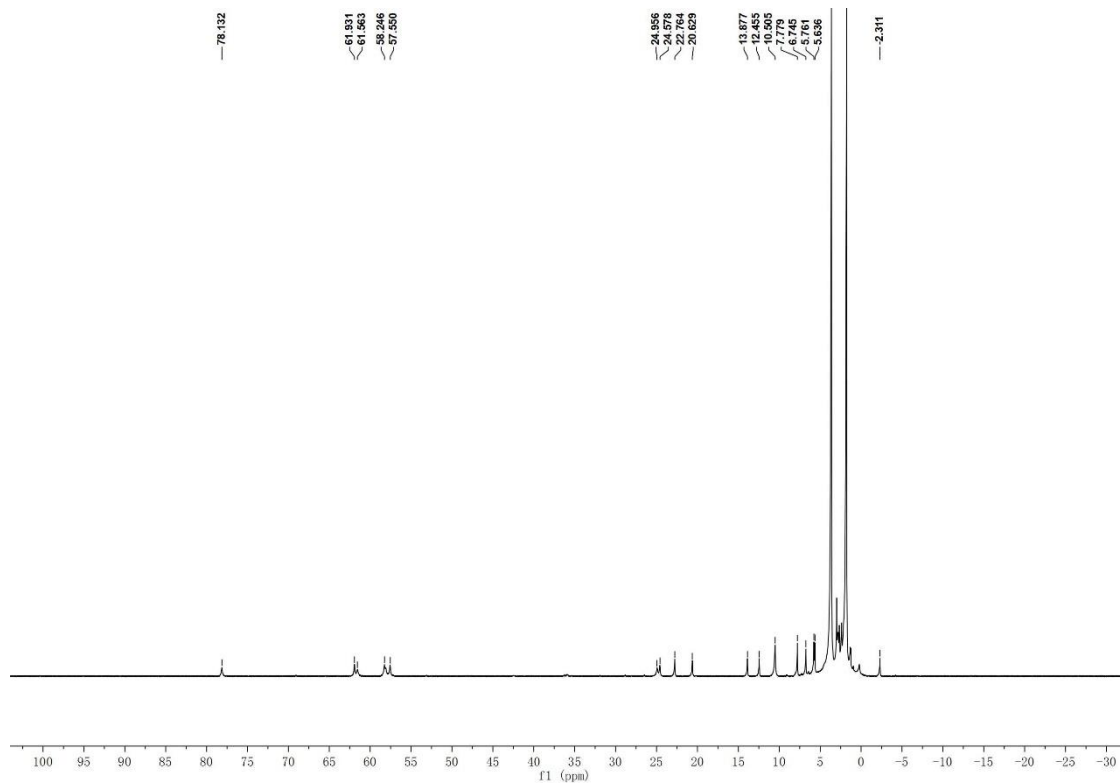

**Figure S5.** The  $^1\text{H}$  NMR (400 MHz, THF- $d_8$ ) spectrum of complex **4**.

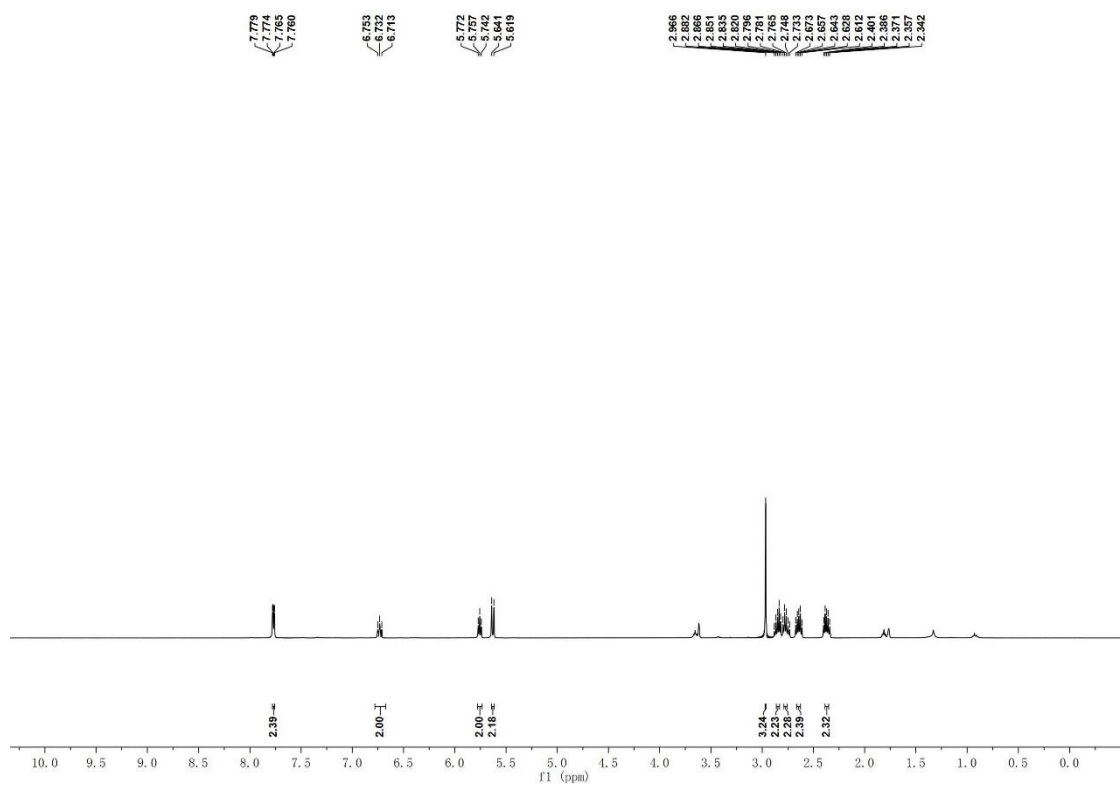

**Figure S6.** The  $^1\text{H}$  NMR (400 MHz, THF- $d_8$ ) spectrum of complex **5**.

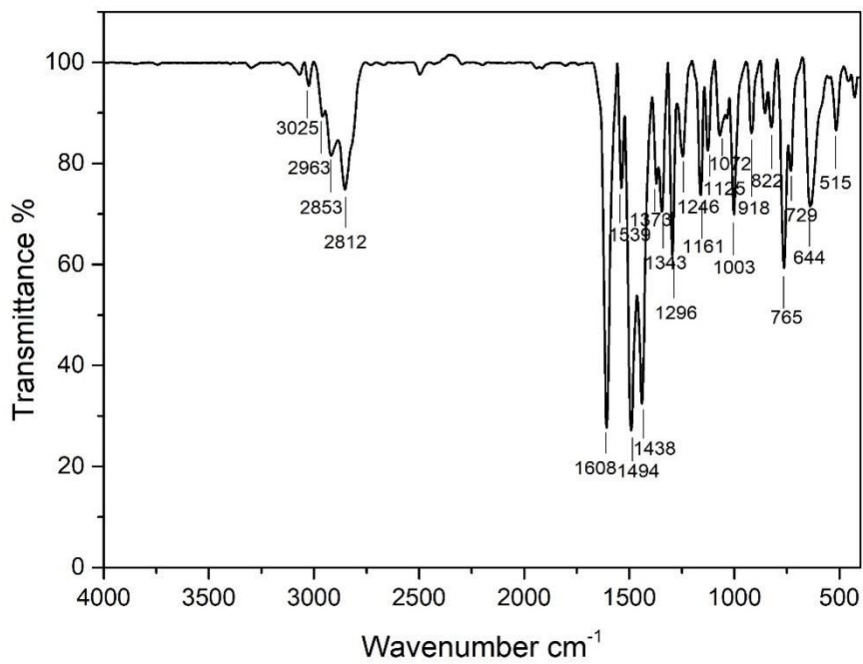

**Figure S7.** FT-IR spectrum of complex 2.

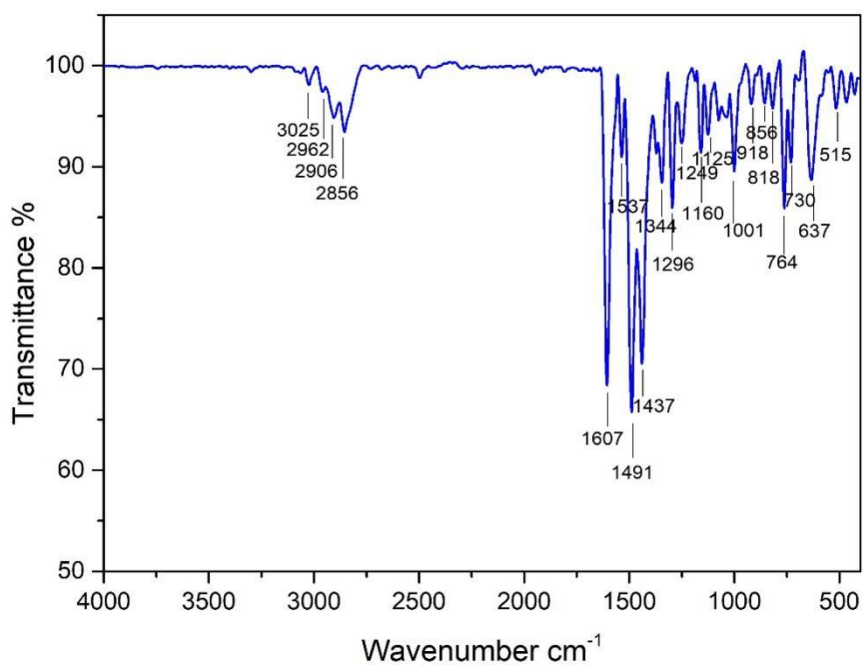

**Figure S8.** FT-IR spectrum of complex 3.

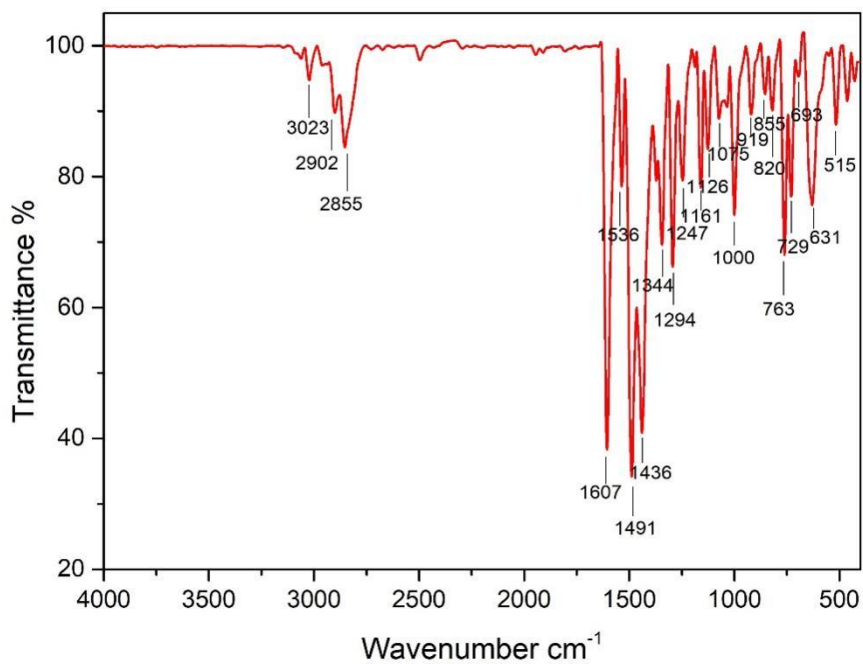

**Figure S9.** FT-IR spectrum of complex 4.

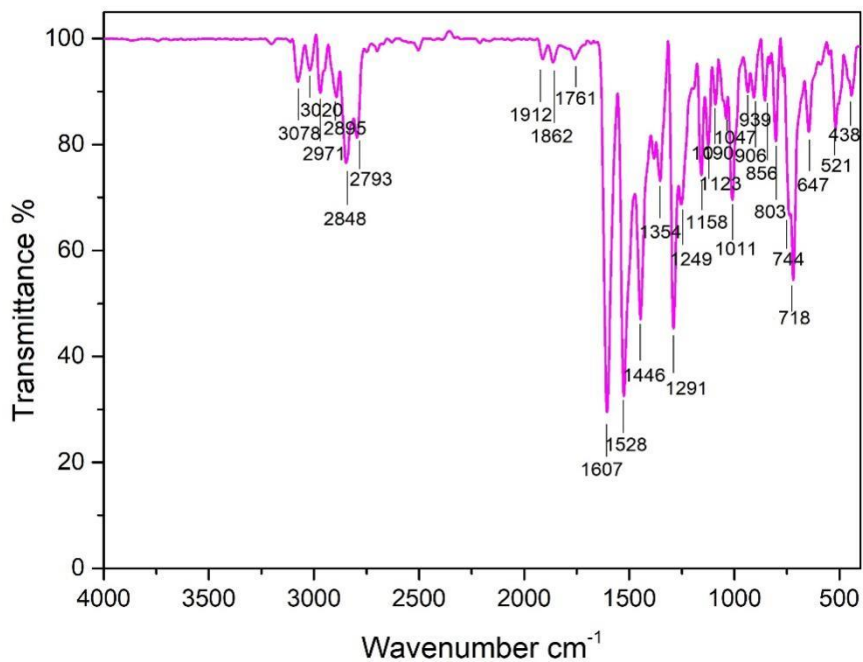

**Figure S10.** FT-IR spectrum of complex 5.

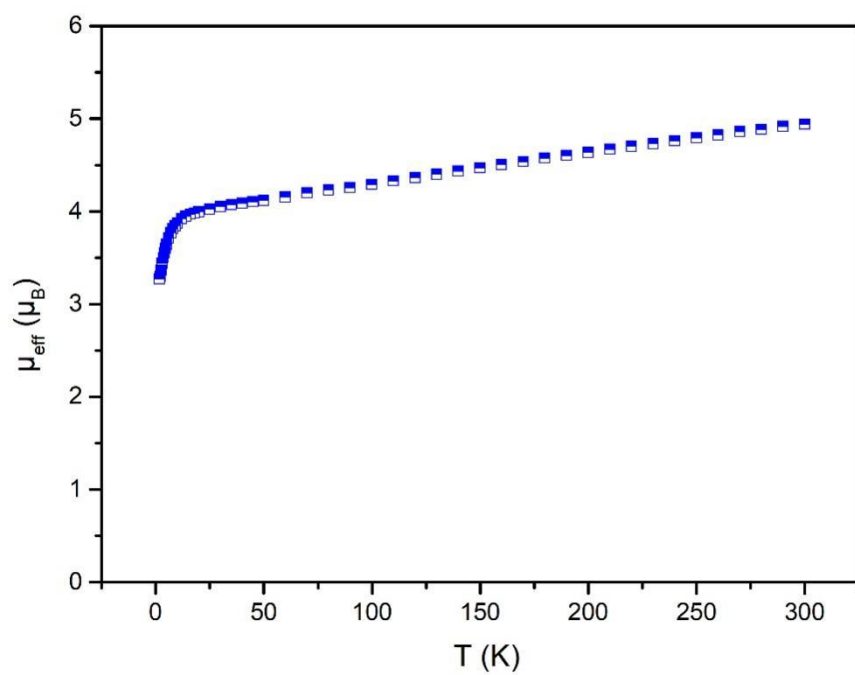

**Figure S11.** Variable-temperature effective magnetic moment data of complex **2** as  $\mu_{\text{eff}}$  vs T.

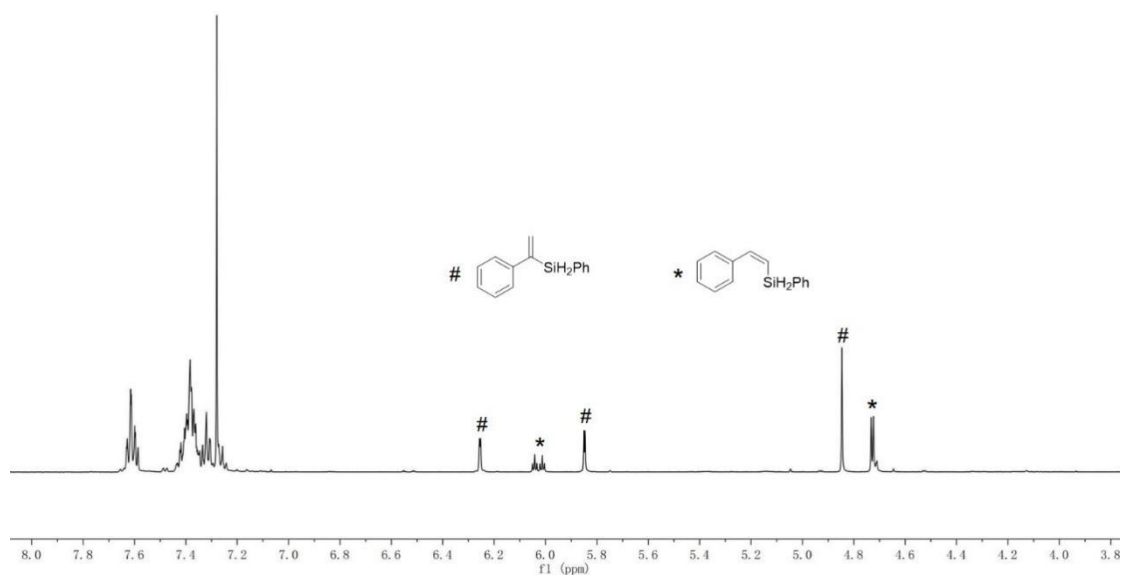

**Figure S12.** The  $^1\text{H}$  NMR (500 MHz,  $\text{CDCl}_3$ ) spectrum of hydrosilylated products from the reaction of phenylacetylene with  $\text{PhSiH}_3$  catalyzed by **2**.

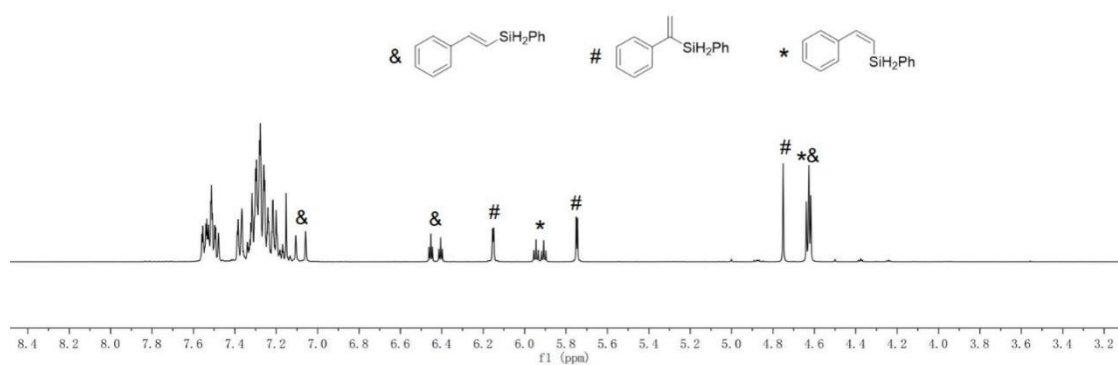

**Figure S13.** The  $^1\text{H}$  NMR (400 MHz,  $\text{CDCl}_3$ ) spectrum of hydrosilylated products from the reaction of phenylacetylene with  $\text{PhSiH}_3$  catalyzed by **3**.

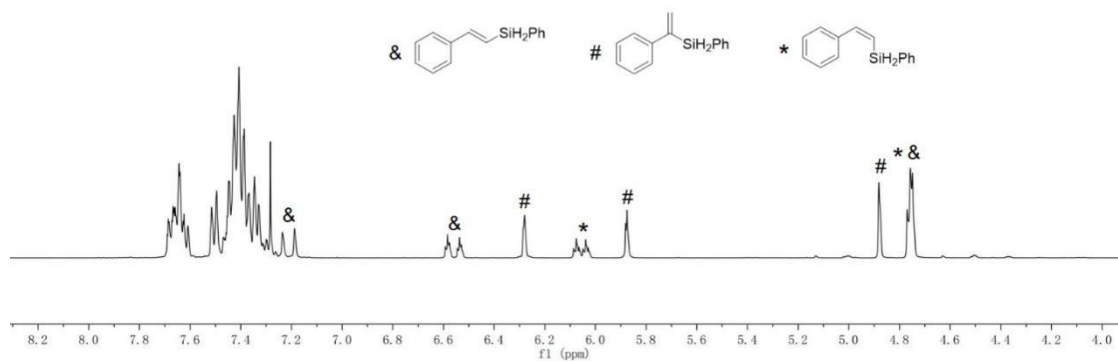

**Figure S14.** The  $^1\text{H}$  NMR (400 MHz,  $\text{CDCl}_3$ ) spectrum of hydrosilylated products from the reaction of phenylacetylene with  $\text{PhSiH}_3$  catalyzed by **4**.

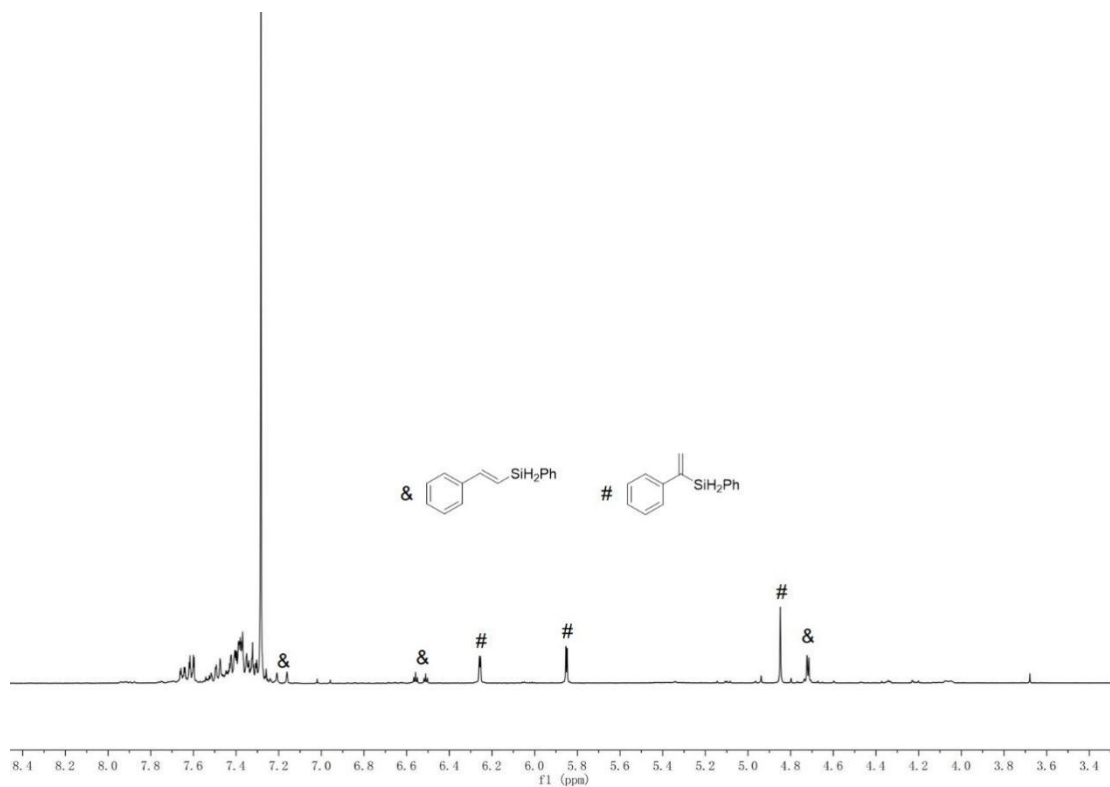

**Figure S15.** The  $^1\text{H}$  NMR (400 MHz,  $\text{CDCl}_3$ ) spectrum of hydrosilylated products from the reaction of phenylacetylene with  $\text{PhSiH}_3$  catalyzed by **5**.

### 3. X-ray crystallographic analysis

The crystallographic data were collected using a Bruker APEX-II CCD area detector with a radiation source of Mo(K $\alpha$ ) (0.71073 Å). Multi-scan or empirical absorption corrections (SADABS) were applied. The structures were solved using Patterson methods, expanded using difference Fourier syntheses, and refined using full-matrix least squares fitting on  $F^2$  using the Bruker SHELXTL-2014 program package.<sup>1,2</sup> All non-hydrogen atoms were refined anisotropically. Hydrogen atoms were introduced at their geometric positions and refined as riding atoms. Evaluation of the CIF using the CheckCIF routine at [www.checkcif.iucr.org](http://www.checkcif.iucr.org) gave no A or B alert for these complexes. These data can be obtained free of charge from the Cambridge Crystallographic Data Centre ([www.ccdc.cam.ac.uk/data-request/cif](http://www.ccdc.cam.ac.uk/data-request/cif)). Details regarding the data collection and refinement for these complexes are given in Table S1.

**Table S1.** Crystal data and structural refinement for **2**, **3**, **4** and **5**.

|                                                | <b>2</b>                                                                       | <b>3</b>                                                                          | <b>4</b>                                                                         | <b>5</b>                                                        |
|------------------------------------------------|--------------------------------------------------------------------------------|-----------------------------------------------------------------------------------|----------------------------------------------------------------------------------|-----------------------------------------------------------------|
| empirical formula                              | C <sub>15</sub> H <sub>19</sub> Cl <sub>2</sub> Co <sub>2</sub> N <sub>5</sub> | C <sub>30</sub> H <sub>38</sub> Br <sub>2</sub> Co <sub>4</sub> N <sub>10</sub> O | C <sub>30</sub> H <sub>38</sub> Co <sub>4</sub> I <sub>2</sub> N <sub>10</sub> O | C <sub>30</sub> H <sub>38</sub> Co <sub>2</sub> N <sub>10</sub> |
| formula weight                                 | 458.11                                                                         | 948.23                                                                            | 1044.22                                                                          | 656.56                                                          |
| temperature, K                                 | 193(2)                                                                         | 193(2)                                                                            | 193(2)                                                                           | 193(2)                                                          |
| wavelength, Å                                  | 0.71073                                                                        | 0.71073                                                                           | 0.71073                                                                          | 0.71073                                                         |
| crystal system                                 | Monoclinic                                                                     | Monoclinic                                                                        | Monoclinic                                                                       | Monoclinic                                                      |
| space group                                    | P2 <sub>1</sub> /n                                                             | C2/c                                                                              | C2/c                                                                             | P2 <sub>1</sub> /c                                              |
| <i>a</i> , Å                                   | 11.9019(6)                                                                     | 22.7129(11)                                                                       | 22.4229(13)                                                                      | 12.9492(4)                                                      |
| <i>b</i> , Å                                   | 11.1915(6)                                                                     | 9.7358(4)                                                                         | 9.8952(6)                                                                        | 12.5051(4)                                                      |
| <i>c</i> , Å                                   | 13.7561(7)                                                                     | 18.7476(9)                                                                        | 19.0944(10)                                                                      | 18.2150(6)                                                      |
| $\alpha$ , °                                   | 90                                                                             | 90                                                                                | 90                                                                               | 90                                                              |
| $\beta$ , °                                    | 92.162(2)                                                                      | 102.994(3)                                                                        | 103.532(3)                                                                       | 106.8170(10)                                                    |
| $\gamma$ , °                                   | 90                                                                             | 90                                                                                | 90                                                                               | 90                                                              |
| <i>V</i> , Å <sup>3</sup>                      | 1831.01(16)                                                                    | 4039.5(3)                                                                         | 4119.0(4)                                                                        | 2823.43(16)                                                     |
| <i>Z</i>                                       | 4                                                                              | 4                                                                                 | 4                                                                                | 4                                                               |
| <i>d</i> <sub>calcd</sub> , g cm <sup>-3</sup> | 1.662                                                                          | 1.559                                                                             | 1.684                                                                            | 1.545                                                           |



|                                                    |                                                            |                                                            |                                                            |                                                            |
|----------------------------------------------------|------------------------------------------------------------|------------------------------------------------------------|------------------------------------------------------------|------------------------------------------------------------|
| $\mu$ , mm <sup>-1</sup>                           | 2.110                                                      | 3.628                                                      | 3.117                                                      | 1.216                                                      |
| $F(000)$                                           | 928.0                                                      | 1888.0                                                     | 2040.0                                                     | 1368.0                                                     |
| crystal size, mm                                   | 0.10 × 0.10 × 0.10                                         | 0.10 × 0.10 × 0.10                                         | 0.10 × 0.10 × 0.10                                         | 0.10 × 0.10 ×<br>0.10                                      |
| $\theta_{\max}$ , °                                | 27.475                                                     | 24.998                                                     | 27.482                                                     | 27.512                                                     |
| reflns collected                                   | 16803                                                      | 14900                                                      | 18798                                                      | 24771                                                      |
|                                                    | 4177                                                       | 3537                                                       | 4701                                                       | 6473                                                       |
| indep reflns                                       | [ $R_{\text{int}}=0.0593$ ,<br>$R_{\text{sigma}}=0.0519$ ] | [ $R_{\text{int}}=0.0410$ ,<br>$R_{\text{sigma}}=0.0352$ ] | [ $R_{\text{int}}=0.0348$ ,<br>$R_{\text{sigma}}=0.0311$ ] | [ $R_{\text{int}}=0.0744$ ,<br>$R_{\text{sigma}}=0.0685$ ] |
| data/restraints/par<br>ams                         | 4177/0/218                                                 | 3537/30/214                                                | 4701/0/214                                                 | 6473/0/381                                                 |
| goodness-of-fit on<br>$F^2$                        | 1.026                                                      | 1.037                                                      | 1.051                                                      | 1.021                                                      |
| final $R$ ( $I > 2\sigma(I)$ )                     | $R_1 = 0.0308$ ,<br>$wR_2 = 0.0775$                        | $R_1 = 0.0416$ ,<br>$wR_2 = 0.1119$                        | $R_1 = 0.0255$ ,<br>$wR_2 = 0.0573$                        | $R_1 = 0.0454$ ,<br>$wR_2 = 0.1077$                        |
| $R$ indices (all<br>data)                          | $R_1 = 0.0398$ ,<br>$wR_2 = 0.0828$                        | $R_1 = 0.0452$ ,<br>$wR_2 = 0.1143$                        | $R_1 = 0.0342$ ,<br>$wR_2 = 0.0606$                        | $R_1 = 0.0724$ ,<br>$wR_2 = 0.1233$                        |
| Residual electron<br>density (e. Å <sup>-3</sup> ) | 0.42/-0.35                                                 | 2.18/-0.69                                                 | 0.77/-0.49                                                 | 0.78/-0.73                                                 |
| max/min                                            |                                                            |                                                            |                                                            |                                                            |
| CCDC                                               | 2346803                                                    | 2346804                                                    | 2346805                                                    | 2346806                                                    |

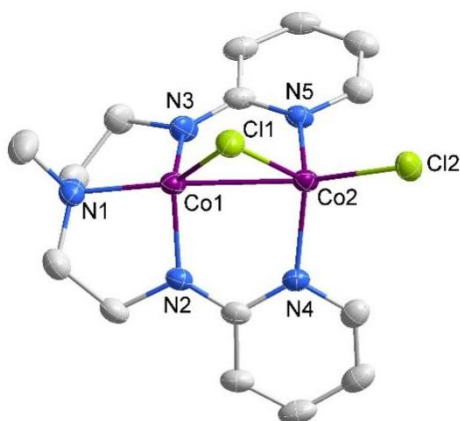

**Figure S16.** X-ray molecular structure of complex **2** drawn with 50% probability. Hydrogen atoms are omitted for clarity.

**Table S2.** Bond distances (Å) and angles (deg) for **2**.

|             |            |           |            |
|-------------|------------|-----------|------------|
| Co2-Co1     | 2.6184(4)  | Co2-Cl1   | 2.3360(6)  |
| Co2-Cl2     | 2.2480(6)  | Co2-N4    | 2.0298(18) |
| Co2-N5      | 2.0238(17) | Co1-Cl1   | 2.2680(6)  |
| Co1-N1      | 2.0619(19) | Co1-N2    | 1.9057(19) |
| Co1-N3      | 1.9086(18) | N4-C6     | 1.368(3)   |
| N4-C10      | 1.360(3)   | N5-C15    | 1.357(3)   |
| N5-C11      | 1.375(3)   | N1-C2     | 1.485(3)   |
| N1-C4       | 1.491(3)   | N1-C1     | 1.471(3)   |
| N2-C6       | 1.341(3)   | N2-C3     | 1.461(3)   |
| N3-C11      | 1.334(3)   | N3-C5     | 1.473(3)   |
| C6-C7       | 1.425(3)   | C15-C14   | 1.369(3)   |
| C11-C12     | 1.423(3)   | C3-C2     | 1.518(3)   |
| C10-C9      | 1.365(3)   | C12-C13   | 1.356(4)   |
| C14-C13     | 1.402(3)   | C7-C8     | 1.366(3)   |
| C4-C5       | 1.518(3)   | C9-C8     | 1.390(4)   |
|             |            |           |            |
| Cl1-Co2-Co1 | 54.124(16) | C4-N1-Co1 | 101.17(14) |

|             |            |             |            |
|-------------|------------|-------------|------------|
| C12-Co2-Co1 | 158.68(2)  | C1-N1-Co1   | 118.15(16) |
| C12-Co2-C11 | 104.67(2)  | C1-N1-C2    | 110.7(2)   |
| N4-Co2-Co1  | 82.75(5)   | C1-N1-C4    | 110.5(2)   |
| N4-Co2-C11  | 114.14(5)  | C6-N2-Co1   | 125.25(15) |
| N4-Co2-C12  | 107.45(5)  | C6-N2-C3    | 117.96(19) |
| N5-Co2-Co1  | 84.56(5)   | C3-N2-Co1   | 113.50(14) |
| N5-Co2-C11  | 108.44(6)  | C11-N3-Co1  | 128.36(15) |
| N5-Co2-C12  | 106.90(5)  | C11-N3-C5   | 119.41(19) |
| N5-Co2-N4   | 114.52(7)  | C5-N3-Co1   | 112.16(16) |
| C11-Co1-Co2 | 56.573(17) | N4-C6-C7    | 119.0(2)   |
| N1-Co1-Co2  | 169.26(5)  | N2-C6-N4    | 116.97(19) |
| N1-Co1-C11  | 134.14(6)  | N2-C6-C7    | 124.0(2)   |
| N2-Co1-Co2  | 88.07(6)   | N5-C15-C14  | 123.8(2)   |
| N2-Co1-C11  | 114.28(6)  | N5-C11-C12  | 118.8(2)   |
| N2-Co1-N1   | 86.91(8)   | N3-C11-N5   | 116.40(19) |
| N2-Co1-N3   | 116.82(8)  | N3-C11-C12  | 124.8(2)   |
| N3-Co1-Co2  | 86.02(6)   | N2-C3-C2    | 109.88(19) |
| N3-Co1-C11  | 113.71(6)  | N4-C10-C9   | 124.0(2)   |
| N3-Co1-N1   | 87.78(8)   | C13-C12-C11 | 120.3(2)   |
| Co1-C11-Co2 | 69.303(18) | N1-C2-C3    | 111.64(19) |
| C6-N4-Co2   | 125.19(15) | C15-C14-C13 | 117.4(2)   |
| C10-N4-Co2  | 115.73(15) | C8-C7-C6    | 120.2(2)   |
| C10-N4-C6   | 118.7(2)   | N1-C4-C5    | 111.27(19) |
| C15-N5-Co2  | 117.26(14) | C10-C9-C8   | 117.8(2)   |
| C15-N5-C11  | 119.03(18) | C12-C13-C14 | 120.5(2)   |
| C11-N5-Co2  | 123.68(15) | C7-C8-C9    | 120.2(2)   |
| C2-N1-Co1   | 103.39(14) | N3-C5-C4    | 107.69(19) |
| C2-N1-C4    | 112.50(18) |             |            |

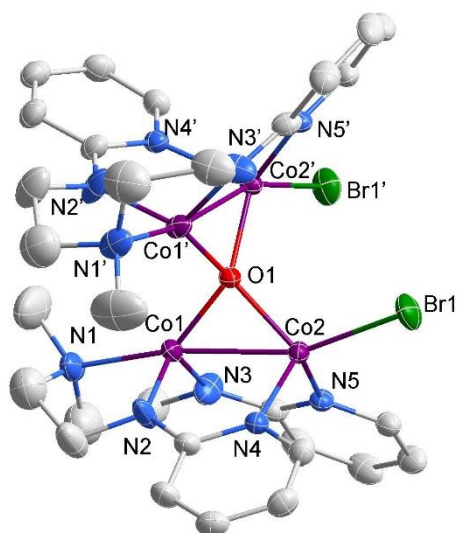

**Figure S17.** X-ray molecular structure of complex **3** drawn with 50% probability. Hydrogen atoms are omitted for clarity.

**Table S3.** Bond distances (Å) and angles (deg) for **3**.

|             |            |           |           |
|-------------|------------|-----------|-----------|
| Br1-Co2     | 2.3999(7)  | C11-C12   | 1.435(6)  |
| Co2-Co1     | 2.5831(7)  | C15-C14   | 1.379(6)  |
| Co2-O1      | 1.9424(18) | N2-C6     | 1.339(6)  |
| Co2-N5      | 2.046(3)   | N2-C3     | 1.472(6)  |
| Co2-N4      | 2.058(3)   | C10-C9    | 1.369(6)  |
| Co1-O1      | 1.921(2)   | N1-C1     | 1.429(8)  |
| Co1-N3      | 1.917(4)   | N1-C2     | 1.551(8)  |
| Co1-N2      | 1.931(4)   | N1-C4     | 1.394(8)  |
| Co1-N1      | 2.071(4)   | C8-C7     | 1.367(7)  |
| N5-C11      | 1.369(5)   | C8-C9     | 1.395(7)  |
| N5-C15      | 1.348(5)   | C7-C6     | 1.417(6)  |
| N4-C10      | 1.348(5)   | C12-C13   | 1.372(7)  |
| N4-C6       | 1.375(5)   | C14-C13   | 1.384(7)  |
| N3-C11      | 1.331(6)   | C5-C4     | 1.660(10) |
| N3-C5       | 1.465(6)   | C3-C2     | 1.534(8)  |
|             |            |           |           |
| Br1-Co2-Co1 | 160.32(3)  | C6-N4-Co2 | 124.5(3)  |

|              |            |             |          |
|--------------|------------|-------------|----------|
| O1-Co2-Br1   | 112.71(7)  | C11-N3-Co1  | 125.9(3) |
| O1-Co2-Co1   | 47.69(7)   | C11-N3-C5   | 120.3(4) |
| O1-Co2-N5    | 112.47(10) | C5-N3-Co1   | 112.9(3) |
| O1-Co2-N4    | 106.26(13) | N5-C11-C12  | 118.7(4) |
| N5-Co2-Br1   | 106.93(10) | N3-C11-N5   | 117.3(4) |
| N5-Co2-Co1   | 83.30(9)   | N3-C11-C12  | 123.9(4) |
| N5-Co2-N4    | 111.44(13) | N5-C15-C14  | 123.3(4) |
| N4-Co2-Br1   | 106.96(10) | C6-N2-Co1   | 126.6(3) |
| N4-Co2-Co1   | 83.83(9)   | C6-N2-C3    | 118.4(4) |
| O1-Co1-Co2   | 48.39(6)   | C3-N2-Co1   | 113.8(3) |
| O1-Co1-N2    | 107.98(14) | N4-C10-C9   | 124.5(4) |
| O1-Co1-N1    | 141.02(13) | C1-N1-Co1   | 119.0(4) |
| N3-Co1-Co2   | 88.62(11)  | C1-N1-C2    | 100.5(5) |
| N3-Co1-O1    | 114.10(15) | C2-N1-Co1   | 103.3(3) |
| N3-Co1-N2    | 119.3(2)   | C4-N1-Co1   | 102.1(4) |
| N3-Co1-N1    | 87.08(17)  | C4-N1-C1    | 119.3(6) |
| N2-Co1-Co2   | 88.28(11)  | C4-N1-C2    | 111.8(5) |
| N2-Co1-N1    | 86.41(16)  | C7-C8-C9    | 119.4(4) |
| N1-Co1-Co2   | 170.48(11) | C8-C7-C6    | 120.7(4) |
| Co2'-O1-Co2  | 124.30(19) | C13-C12-C11 | 119.7(4) |
| Co1'-O1-Co2  | 129.54(3)  | N4-C6-C7    | 119.2(4) |
| Co1'-O1-Co2' | 83.92(2)   | N2-C6-N4    | 116.6(4) |
| Co1-O1-Co2   | 83.92(2)   | N2-C6-C7    | 124.2(4) |
| Co1-O1-Co2'  | 129.55(3)  | C10-C9-C8   | 117.8(4) |
| Co1'-O1-Co1  | 110.78(18) | C15-C14-C13 | 118.2(4) |
| C11-N5-Co2   | 124.5(3)   | C12-C13-C14 | 120.4(4) |
| C15-N5-Co2   | 115.8(3)   | N3-C5-C4    | 103.6(5) |
| C15-N5-C11   | 119.7(4)   | N2-C3-C2    | 109.4(5) |
| C10-N4-Co2   | 117.3(3)   | C3-C2-N1    | 108.4(5) |

|           |          |          |          |
|-----------|----------|----------|----------|
| C10-N4-C6 | 118.2(4) | N1-C4-C5 | 108.8(5) |
|-----------|----------|----------|----------|

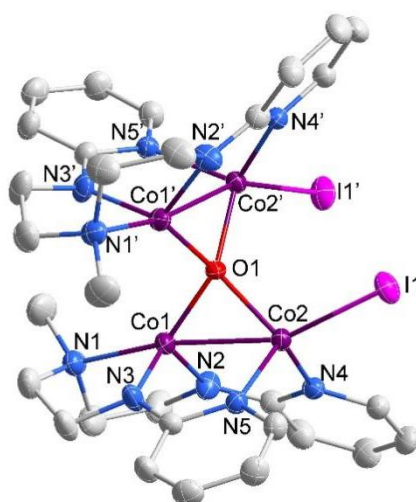

**Figure S18.** X-ray molecular structure of complex **4** drawn with 50% probability. Hydrogen atoms are omitted for clarity.

**Table S4.** Bond distances (Å) and angles (deg) for **4**.

|         |            |         |          |
|---------|------------|---------|----------|
| I1-Co2  | 2.6041(4)  | N3-C11  | 1.337(3) |
| Co2-Co1 | 2.5735(5)  | N3-C5   | 1.463(3) |
| Co2-O1  | 1.9411(11) | N1-C4   | 1.497(4) |
| Co2-N4  | 2.048(2)   | N1-C1   | 1.459(3) |
| Co2-N5  | 2.059(2)   | N1-C2   | 1.467(4) |
| Co1-O1  | 1.9245(14) | C6-C7   | 1.427(4) |
| Co1-N2  | 1.919(2)   | C10-C9  | 1.370(4) |
| Co1-N3  | 1.933(2)   | C11-C12 | 1.419(4) |
| Co1-N1  | 2.074(2)   | C15-C14 | 1.368(4) |
| N4-C6   | 1.373(3)   | C12-C13 | 1.363(4) |
| N4-C10  | 1.339(3)   | C9-C8   | 1.389(4) |
| N5-C11  | 1.376(3)   | C13-C14 | 1.392(4) |
| N5-C15  | 1.352(3)   | C7-C8   | 1.362(4) |
| N2-C6   | 1.335(3)   | C5-C4   | 1.524(4) |

|              |             |             |            |
|--------------|-------------|-------------|------------|
| N2-C3        | 1.465(3)    | C3-C2       | 1.538(5)   |
| Co1'-Co2-I1  | 158.117(16) | C15-N5-C11  | 118.3(2)   |
| O1-Co2-I1    | 110.20(5)   | C6-N2-Co1   | 126.98(18) |
| O1-Co2-Co1'  | 47.99(4)    | C6-N2-C3    | 120.7(2)   |
| O1-Co2-N4'   | 113.00(6)   | C3-N2-Co1   | 111.94(18) |
| O1-Co2-N5'   | 105.74(8)   | C11-N3-Co1  | 125.71(19) |
| N4'-Co2-I1   | 106.87(6)   | C11-N3-C5   | 118.6(2)   |
| N4'-Co2-Co1' | 84.48(6)    | C5-N3-Co1   | 113.80(17) |
| N4'-Co2-N5'  | 113.29(8)   | C4-N1-Co1   | 103.85(16) |
| N5'-Co2-I1   | 107.64(6)   | C1-N1-Co1   | 118.67(19) |
| N5'-Co2-Co1' | 83.72(6)    | C1-N1-C4    | 108.6(2)   |
| O1-Co1-Co2'  | 48.54(4)    | C1-N1-C2    | 112.5(2)   |
| O1-Co1-N3    | 107.33(8)   | C2-N1-Co1   | 100.94(17) |
| O1-Co1-N1    | 140.95(7)   | C2-N1-C4    | 111.9(2)   |
| N2-Co1-Co2'  | 87.93(7)    | N4-C6-C7    | 118.6(2)   |
| N2-Co1-O1    | 114.62(9)   | N2-C6-N4    | 117.1(2)   |
| N2-Co1-N3    | 119.28(10)  | N2-C6-C7    | 124.2(2)   |
| N2-Co1-N1    | 87.17(9)    | N4-C10-C9   | 124.5(3)   |
| N3-Co1-Co2'  | 88.78(7)    | N5-C11-C12  | 119.0(2)   |
| N3-Co1-N1    | 86.51(9)    | N3-C11-N5   | 117.0(2)   |
| N1-Co1-Co2'  | 170.47(6)   | N3-C11-C12  | 124.0(2)   |
| Co2'-O1-Co2  | 125.00(12)  | N5-C15-C14  | 124.6(3)   |
| Co1-O1-Co2   | 129.84(2)   | C13-C12-C11 | 120.5(3)   |
| Co1'-O1-Co2  | 83.479(16)  | C10-C9-C8   | 117.5(3)   |
| Co1-O1-Co2'  | 83.479(16)  | C12-C13-C14 | 120.1(3)   |
| Co1'-O1-Co2' | 129.84(2)   | C8-C7-C6    | 120.3(3)   |
| Co1-O1-Co1'  | 110.40(12)  | C15-C14-C13 | 117.4(3)   |
| C6-N4-Co2'   | 123.39(17)  | N3-C5-C4    | 109.5(2)   |

|             |            |          |          |
|-------------|------------|----------|----------|
| C10-N4-Co2' | 117.72(18) | N1-C4-C5 | 112.1(2) |
| C10-N4-C6   | 118.9(2)   | C7-C8-C9 | 120.2(3) |
| C11-N5-Co2' | 124.31(17) | N2-C3-C2 | 106.8(2) |
| C15-N5-Co2' | 117.30(18) | N1-C2-C3 | 110.5(2) |

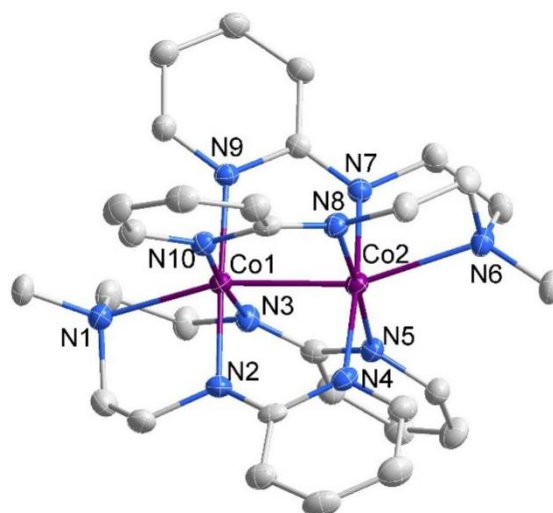

**Figure S19.** X-ray molecular structure of complex **5** drawn with 50% probability. Hydrogen atoms are omitted for clarity.

**Table S5.** Bond distances (Å) and angles (deg) for **5**.

|         |           |         |          |
|---------|-----------|---------|----------|
| Co2-Co1 | 2.3682(6) | N6-C17  | 1.478(4) |
| Co2-N8  | 1.917(2)  | N6-C19  | 1.491(4) |
| Co2-N5  | 1.948(2)  | N6-C16  | 1.471(4) |
| Co2-N4  | 1.976(3)  | N1-C1   | 1.479(4) |
| Co2-N7  | 1.957(3)  | N1-C4   | 1.481(4) |
| Co2-N6  | 2.302(3)  | N1-C2   | 1.483(4) |
| Co1-N10 | 1.973(2)  | C11-C12 | 1.436(4) |
| Co1-N9  | 1.947(2)  | C26-C27 | 1.434(4) |
| Co1-N3  | 1.956(2)  | C21-C22 | 1.431(4) |
| Co1-N2  | 1.925(3)  | C6-C7   | 1.441(4) |



|            |            |            |            |
|------------|------------|------------|------------|
| Co1-N1     | 2.295(3)   | C30-C29    | 1.371(4)   |
| N10-C26    | 1.376(4)   | C25-C24    | 1.371(4)   |
| N10-C30    | 1.348(4)   | C12-C13    | 1.365(4)   |
| N9-C21     | 1.380(4)   | C5-C4      | 1.517(4)   |
| N9-C25     | 1.341(4)   | C15-C14    | 1.376(4)   |
| N3-C11     | 1.322(4)   | C22-C23    | 1.370(4)   |
| N3-C5      | 1.462(4)   | C10-C9     | 1.376(5)   |
| N8-C26     | 1.328(4)   | C3-C2      | 1.507(4)   |
| N8-C20     | 1.445(4)   | C23-C24    | 1.392(4)   |
| N2-C6      | 1.321(4)   | C13-C14    | 1.393(5)   |
| N2-C3      | 1.454(4)   | C27-C28    | 1.356(4)   |
| N5-C11     | 1.373(4)   | C17-C18    | 1.511(4)   |
| N5-C15     | 1.345(4)   | C20-C19    | 1.516(4)   |
| N4-C6      | 1.375(4)   | C9-C8      | 1.387(5)   |
| N4-C10     | 1.342(4)   | C7-C8      | 1.362(5)   |
| N7-C21     | 1.324(4)   | C28-C29    | 1.394(5)   |
| N7-C18     | 1.451(4)   |            |            |
|            |            |            |            |
| N8-Co2-Co1 | 87.55(8)   | C21-N7-Co2 | 124.1(2)   |
| N8-Co2-N5  | 175.53(11) | C21-N7-C18 | 115.9(3)   |
| N8-Co2-N4  | 87.23(10)  | C18-N7-Co2 | 118.5(2)   |
| N8-Co2-N7  | 92.97(10)  | C17-N6-Co2 | 100.09(18) |
| N8-Co2-N6  | 82.77(10)  | C17-N6-C19 | 111.5(3)   |
| N5-Co2-Co1 | 90.10(7)   | C19-N6-Co2 | 99.86(17)  |
| N5-Co2-N4  | 88.97(10)  | C16-N6-Co2 | 128.9(2)   |
| N5-Co2-N7  | 90.62(10)  | C16-N6-C17 | 107.4(2)   |
| N5-Co2-N6  | 100.53(9)  | C16-N6-C19 | 108.4(2)   |
| N4-Co2-Co1 | 89.86(8)   | C1-N1-Co1  | 128.6(2)   |
| N4-Co2-N6  | 105.58(10) | C1-N1-C4   | 107.3(2)   |

|             |            |             |            |
|-------------|------------|-------------|------------|
| N7-Co2-Co1  | 85.38(7)   | C1-N1-C2    | 108.3(2)   |
| N7-Co2-N4   | 175.22(10) | C4-N1-Co1   | 100.75(17) |
| N7-Co2-N6   | 79.18(10)  | C4-N1-C2    | 111.5(2)   |
| N6-Co2-Co1  | 161.27(7)  | C2-N1-Co1   | 99.77(18)  |
| N10-Co1-Co2 | 89.62(7)   | N3-C11-N5   | 116.8(3)   |
| N10-Co1-N1  | 106.14(10) | N3-C11-C12  | 125.2(3)   |
| N9-Co1-Co2  | 90.54(7)   | N5-C11-C12  | 118.0(3)   |
| N9-Co1-N10  | 88.06(10)  | N10-C26-C27 | 118.2(3)   |
| N9-Co1-N3   | 90.42(10)  | N8-C26-N10  | 117.3(2)   |
| N9-Co1-N1   | 100.71(10) | N8-C26-C27  | 124.6(3)   |
| N3-Co1-Co2  | 85.53(8)   | N9-C21-C22  | 117.5(3)   |
| N3-Co1-N10  | 174.91(10) | N7-C21-N9   | 116.8(3)   |
| N3-Co1-N1   | 78.92(10)  | N7-C21-C22  | 125.7(3)   |
| N2-Co1-Co2  | 86.93(8)   | N2-C6-N4    | 117.1(3)   |
| N2-Co1-N10  | 87.78(10)  | N2-C6-C7    | 124.8(3)   |
| N2-Co1-N9   | 175.15(11) | N4-C6-C7    | 118.0(3)   |
| N2-Co1-N3   | 93.50(11)  | N10-C30-C29 | 125.0(3)   |
| N2-Co1-N1   | 82.86(10)  | N9-C25-C24  | 124.9(3)   |
| N1-Co1-Co2  | 160.78(7)  | C13-C12-C11 | 120.6(3)   |
| C26-N10-Co1 | 118.31(19) | N3-C5-C4    | 110.7(2)   |
| C30-N10-Co1 | 123.4(2)   | N5-C15-C14  | 124.6(3)   |
| C30-N10-C26 | 118.3(2)   | C23-C22-C21 | 121.0(3)   |
| C21-N9-Co1  | 118.0(2)   | N4-C10-C9   | 124.9(3)   |
| C25-N9-Co1  | 122.9(2)   | N2-C3-C2    | 107.7(2)   |
| C25-N9-C21  | 119.1(3)   | C22-C23-C24 | 119.9(3)   |
| C11-N3-Co1  | 124.0(2)   | C12-C13-C14 | 120.0(3)   |
| C11-N3-C5   | 116.1(2)   | N1-C4-C5    | 111.9(3)   |
| C5-N3-Co1   | 118.80(19) | C28-C27-C26 | 120.7(3)   |
| C26-N8-Co2  | 122.4(2)   | N6-C17-C18  | 112.0(2)   |

---

|            |            |             |          |
|------------|------------|-------------|----------|
| C26-N8-C20 | 119.6(2)   | N8-C20-C19  | 107.6(2) |
| C20-N8-Co2 | 113.66(19) | N6-C19-C20  | 109.7(3) |
| C6-N2-Co1  | 123.1(2)   | C10-C9-C8   | 117.3(3) |
| C6-N2-C3   | 119.8(3)   | C8-C7-C6    | 120.6(3) |
| C3-N2-Co1  | 113.3(2)   | N7-C18-C17  | 111.0(3) |
| C11-N5-Co2 | 118.3(2)   | N1-C2-C3    | 110.1(3) |
| C15-N5-Co2 | 122.7(2)   | C25-C24-C23 | 117.1(3) |
| C15-N5-C11 | 119.0(3)   | C27-C28-C29 | 120.1(3) |
| C6-N4-Co2  | 118.2(2)   | C7-C8-C9    | 120.1(3) |
| C10-N4-Co2 | 123.0(2)   | C30-C29-C28 | 117.1(3) |
| C10-N4-C6  | 118.8(3)   | C15-C14-C13 | 117.2(3) |

#### 4. Theoretical Calculations

All the geometry optimizations were performed using the Gaussian 16 package<sup>3</sup> with the TPSS functional<sup>4</sup> in the gas phase. The 6-31+g(d) basis set was used for C, H, O, and N atoms.<sup>5</sup> SDD was employed to describe Cl, Br, and Co atoms.<sup>6</sup> The wavefunction stability was assessed across all optimized structures to ensure their reliability. The relative mean deviation (RD) in Table S6 suggest that the TPSS-GD3BJ<sup>7</sup>/6-31+g(d)-SDD method provides well-optimized structural parameters for complexes **2**. The optimized structures on the local minimum geometry by frequency calculations (no imaginary frequency). The natural bond orbital (NBO) calculations<sup>8</sup> were carried out at TPSS-GD3BJ/6-31+g(d,p)-SDD//TPSS-GD3BJ/6-31+g(d)-SDD level<sup>9</sup>. The principal interacting orbital (PIO) analyses were performed with the PIO software.<sup>10</sup> To align the  $\alpha$  and  $\beta$  orbitals produced by the open-shell calculations, biorthogonalization was carried out using the canonical orbitals via the Multiwfn program<sup>11</sup>. Time dependent density functional theory (TD-DFT) was performed to calculate UV-vis spectra, under TD-DFT//TPSS-D3BJ/6-31++G(d,p)~SDD-SMD(THF)//TPSS-D3BJ/6-31+G(d)~SDD level including solvent effect in a SMD continuum model (solvent = THF).<sup>12</sup> The UV-Vis spectrum and spin density analysis and visualization were plotted with the help of Multiwfn<sup>11</sup> and VMD programs.<sup>13</sup>

**Table S6.** The relative free energy of **2** in possible spin states with DFT functional TPSS and B3LYP. The energy were given in kcal/mol.

|         | Multiplicity | TPSS- $\Delta G$ (kcal/mol) | B3LYP <sup>14</sup> - $\Delta G$ (kcal/mol) |
|---------|--------------|-----------------------------|---------------------------------------------|
| Singlet | 1            | 0.0                         | 0.0                                         |
| Triplet | 3            | -26.4                       | -36.9                                       |
| Quintet | 5            | -22.0                       | -40.9                                       |
| Septet  | 7            | -35.6                       | -60.2                                       |
| Nonet   | 9            | 25.8                        | 4.6                                         |
| --      | 11           | 91.3                        | 70.4                                        |

**Table S7.** Key distances (Å) of experiment and DFT calculation structures of **2**.

| Bond length | Exp.  | B3LYP |       | B3PW91 <sup>15</sup> |       | PBE0 <sup>16</sup> |       | TPSS  |       |
|-------------|-------|-------|-------|----------------------|-------|--------------------|-------|-------|-------|
|             |       | Cal.  | RD    | Cal.                 | RD    | Cal.               | RD    | Cal.  | RD    |
| Co1-N1      | 2.062 | 2.101 | 1.89% | 2.086                | 1.16% | 2.087              | 1.21% | 2.099 | 1.79% |
| Co1-N2      | 1.909 | 1.936 | 1.41% | 1.923                | 0.73% | 1.928              | 1.00% | 1.926 | 0.89% |
| Co1-N3      | 1.906 | 1.949 | 2.26% | 1.938                | 1.68% | 1.942              | 1.89% | 1.943 | 1.94% |
| Co1-Co2     | 2.618 | 2.772 | 5.88% | 2.734                | 4.43% | 2.76               | 5.42% | 2.648 | 1.15% |
| Co1-Cl1     | 2.266 | 2.328 | 2.65% | 2.312                | 1.94% | 2.318              | 2.20% | 2.309 | 1.81% |
| Co2-Cl1     | 2.336 | 2.459 | 5.27% | 2.443                | 4.58% | 2.441              | 4.49% | 2.454 | 5.05% |
| Co2-N4      | 2.024 | 2.072 | 2.37% | 2.055                | 1.53% | 2.043              | 0.94% | 2.044 | 0.99% |
| Co2-N5      | 2.030 | 2.052 | 1.08% | 2.033                | 0.15% | 2.066              | 1.77% | 2.019 | 0.54% |
| Co2-Cl2     | 2.248 | 2.287 | 1.73% | 2.275                | 1.20% | 2.277              | 1.29% | 2.288 | 1.78% |
| RD-Average  |       | 2.73% |       | 1.93%                |       | 2.25%              |       | 1.77% |       |

---

$$RD = \sum_{i=1}^n \frac{|BL_{Exp} - BL_{DFT}|}{BL_{Exp}}$$

Where  $BL_{Exp}$  and  $BL_{DFT}$  represent the bond length measured by experiment and DFT calculation respectively.

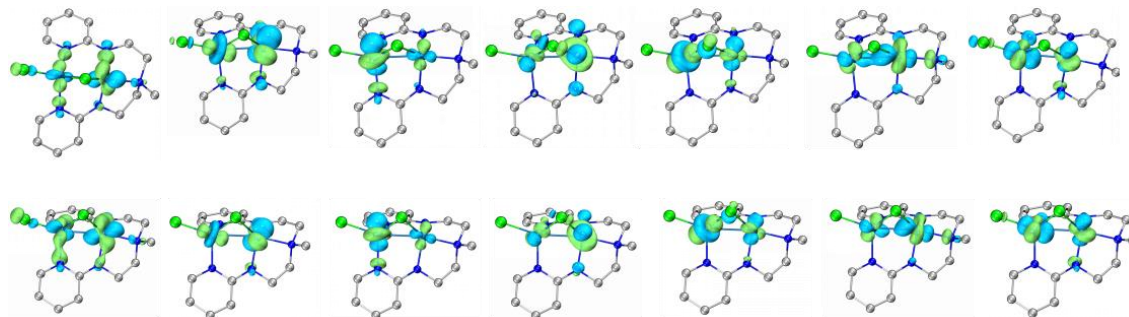

**Figure S20.** The frontier molecular orbitals for complex **2** with wavefunction biorthogonalization.

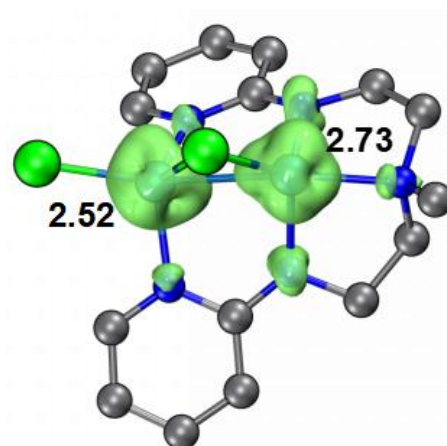

**Figure S21.** Spin density populations for complex **2**.

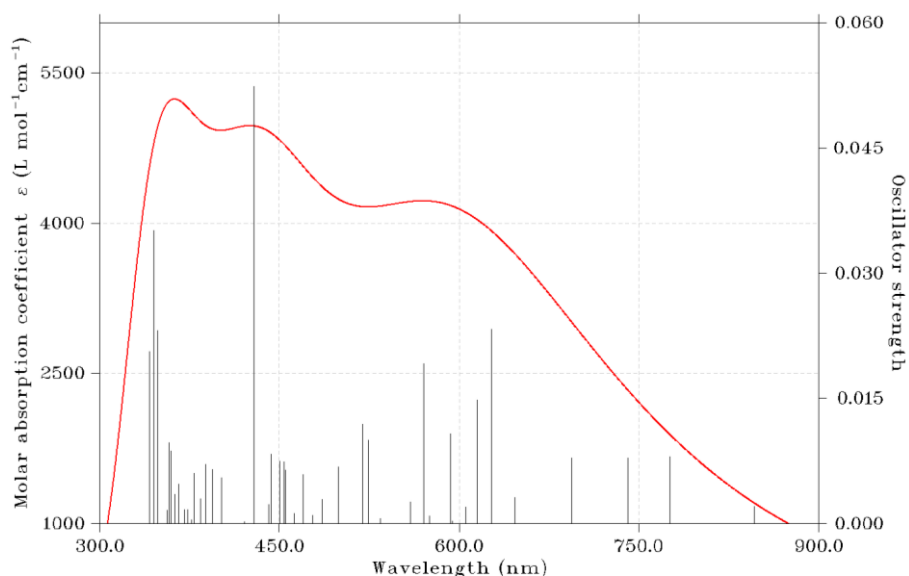

**Figure S22.** Calculated and plotted UV-vis spectrum of Complex **2** at the TD-DFT//TPSS-D3BJ/6-311++G(d,p)~SDD-SMD(THF)//TPSS-D3BJ/6-31+G(d)~SDD level.

**Table S8.** Calculated UV absorption properties of **2**, including energy(eV), wavelength (nm), oscillator strength (f) and the Transition with absolute contribution.

| Energy/eV | Wavelength/nm | Oscillator strength/f | Transition with absolute contribution                                                                                                                                                                                                                                                                            |
|-----------|---------------|-----------------------|------------------------------------------------------------------------------------------------------------------------------------------------------------------------------------------------------------------------------------------------------------------------------------------------------------------|
| 1.98      | 627.23        | 0.0233                | SOMO-1 ( $\beta$ ) $\rightarrow$ LUMO+2 ( $\beta$ ) (46.5%)<br>SOMO-2 ( $\beta$ ) $\rightarrow$ LUMO+1 ( $\beta$ ) (22.6%)<br>SOMO( $\beta$ ) $\rightarrow$ LUMO+1 ( $\beta$ ) (10.8%)<br>SOMO-1 ( $\beta$ ) $\rightarrow$ LUMO+1 ( $\beta$ ) (7.2%)                                                             |
| 2.89      | 429.04        | 0.0524                | SOMO-2 ( $\beta$ ) $\rightarrow$ LUMO+4 ( $\beta$ ) (21.3%)<br>SOMO-1 ( $\beta$ ) $\rightarrow$ LUMO ( $\beta$ ) (19.1%)<br>SOMO-3 ( $\beta$ ) $\rightarrow$ LUMO+4 ( $\beta$ ) (12.5%)<br>SOMO-3 ( $\beta$ ) $\rightarrow$ LUMO+1 ( $\beta$ ) (16.0%)                                                           |
| 3.59      | 345.47        | 0.0351                | SOMO( $\alpha$ ) $\rightarrow$ LUMO+2 ( $\alpha$ ) (21.4%)<br>SOMO( $\alpha$ ) $\rightarrow$ LUMO+3 ( $\alpha$ ) (14.9%)<br>SOMO-2 ( $\beta$ ) $\rightarrow$ LUMO+7 ( $\beta$ ) (10.2%)<br>SOMO( $\beta$ ) $\rightarrow$ LUMO+9 ( $\beta$ ) (7.9%)<br>SOMO-3 ( $\beta$ ) $\rightarrow$ LUMO+7 ( $\beta$ ) (6.5%) |

**Table S9.** The relative free energy of **3** in possible spin states with DFT functional TPSS. The energies were given in kcal/mol.

|         | Multiplicity | TPSS- $\Delta G$ (kcal/mol) |
|---------|--------------|-----------------------------|
| Singlet | 1            | 0.0                         |
| Triplet | 3            | -66.74                      |
| Quintet | 5            | -56.83                      |
| Septet  | 7            | -55.23                      |

|       |    |        |
|-------|----|--------|
| Nonet | 9  | -51.66 |
| --    | 11 | -61.11 |

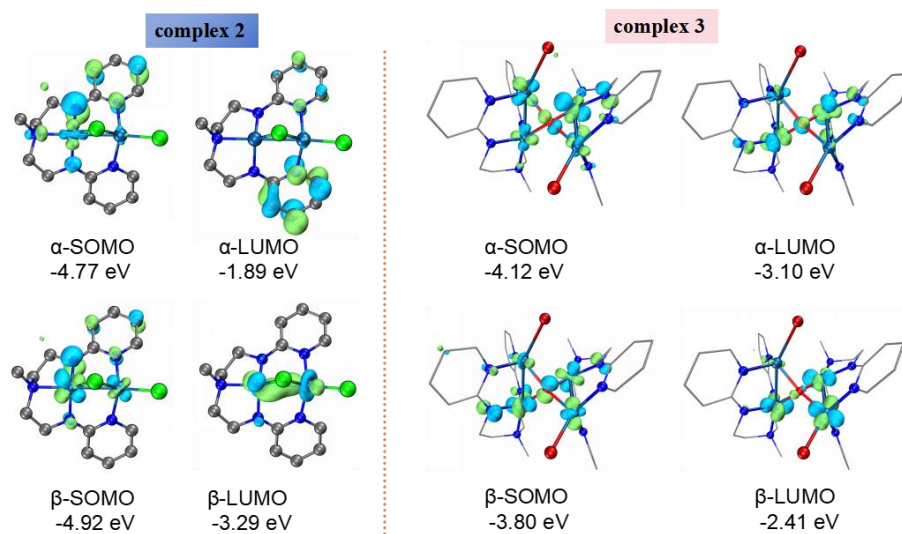

**Figure S23.** The frontier molecular orbitals for complexes **2** and **3**.

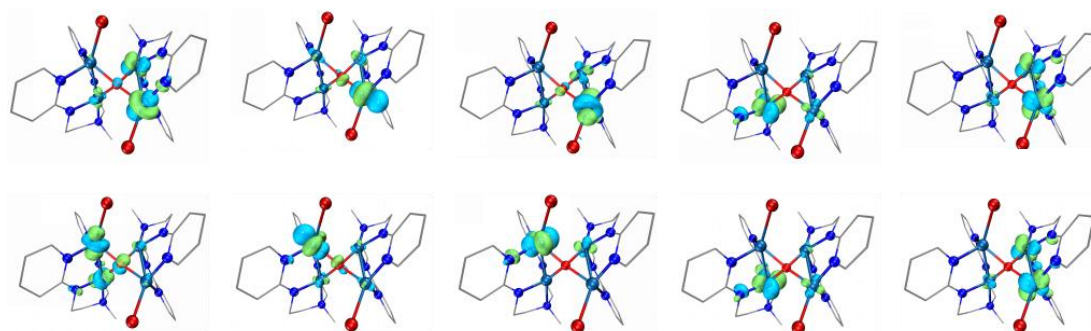

**Figure S24.** The frontier molecular orbitals for complex **3** from SOMO to SOMO-4 with wavefunction biorthogonalization.

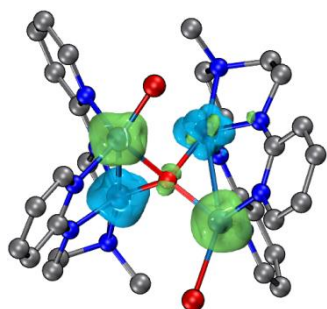

**Figure S25.** Spin density populations for complex **3**.

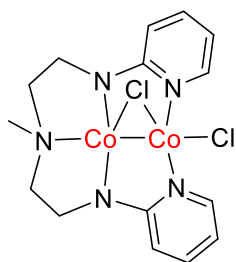

2-B3LYP (0 1)

E = -2069.15613605 au

|    |             |             |             |
|----|-------------|-------------|-------------|
| Co | -1.01888900 | -0.22791400 | 1.10650500  |
| Co | 1.01524300  | 0.25581900  | 0.38916800  |
| Cl | 1.11711100  | -1.22190700 | 2.16160700  |
| Cl | -1.32330300 | 1.24158800  | 2.76478800  |
| N  | -1.78712900 | 0.97925700  | -0.16914800 |
| N  | -1.04184500 | -1.75466400 | -0.09718800 |
| N  | 2.89374700  | 0.79526300  | -0.30708400 |
| N  | 0.37644700  | 1.73187000  | -0.53262000 |
| N  | 1.01118500  | -1.08683300 | -0.90562700 |
| C  | -0.94236200 | 1.83733100  | -0.82834800 |
| C  | -2.07815700 | -2.61541900 | -0.05888200 |
| H  | -2.90561300 | -2.32580300 | 0.58541700  |
| C  | 0.05336400  | -2.03203400 | -0.87348000 |
| C  | 1.36514500  | 2.51228400  | -1.25648600 |
| H  | 1.16441800  | 3.59198200  | -1.18709400 |
| H  | 1.37729100  | 2.26330800  | -2.33191800 |
| C  | -3.11343200 | 1.04978000  | -0.37066100 |
| H  | -3.71554400 | 0.35736600  | 0.21000600  |
| C  | 0.09475000  | -3.26190300 | -1.59453000 |
| H  | 0.97001600  | -3.51413800 | -2.18141400 |
| C  | 2.73151400  | 2.24391100  | -0.61248000 |
| H  | 3.55235800  | 2.60504700  | -1.25146900 |
| H  | 2.78698200  | 2.77419300  | 0.34362000  |
| C  | -2.10950100 | -3.80569100 | -0.76456600 |
| H  | -2.96795100 | -4.46439100 | -0.69643200 |
| C  | -1.49279000 | 2.77359500  | -1.74438000 |
| H  | -0.83518700 | 3.44754700  | -2.28093500 |
| C  | 3.07161800  | -0.02870200 | -1.54079900 |
| H  | 4.14086200  | -0.16801900 | -1.75269500 |
| H  | 2.62989400  | 0.51352300  | -2.37981700 |
| C  | -3.70457200 | 1.95011800  | -1.24464500 |

|   |             |             |             |
|---|-------------|-------------|-------------|
| H | -4.78197700 | 1.96755200  | -1.36537000 |
| C | -0.98155500 | -4.12586000 | -1.54219100 |
| H | -0.94803900 | -5.05935100 | -2.09883200 |
| C | -2.86211500 | 2.82664800  | -1.94345300 |
| H | -3.27789600 | 3.54873700  | -2.64185000 |
| C | 2.34975100  | -1.36938000 | -1.39236900 |
| H | 2.33597400  | -1.86067300 | -2.37569200 |
| H | 2.89483100  | -2.03405800 | -0.70050100 |
| C | 3.99033400  | 0.56400100  | 0.65649200  |
| H | 3.76617900  | 1.07627000  | 1.59510300  |
| H | 4.94899300  | 0.93112800  | 0.25837800  |
| H | 4.06935000  | -0.50455300 | 0.86596700  |

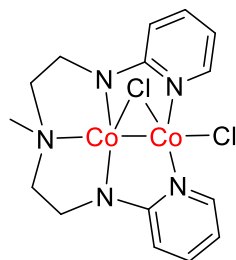

2-B3LYP (0 3)

E = -2069.21005235 au

|    |             |             |             |
|----|-------------|-------------|-------------|
| Co | 1.43847300  | -0.20827600 | 0.69677800  |
| Co | -1.18410200 | 0.18945300  | 0.64494800  |
| Cl | 0.02847600  | 0.23168500  | 2.63306900  |
| Cl | 3.56755800  | -0.61637100 | 1.42979500  |
| N  | 0.88659300  | -1.91705600 | -0.30518900 |
| N  | 1.51971400  | 1.51794900  | -0.37562400 |
| N  | -3.21475300 | 0.50543200  | 0.22541700  |
| N  | -1.40662300 | -1.55209100 | -0.14680900 |
| N  | -0.79188100 | 1.65458600  | -0.55521400 |
| C  | -0.39566900 | -2.30820100 | -0.62019300 |
| C  | 2.75684600  | 2.00708400  | -0.62258100 |
| H  | 3.57207200  | 1.41706900  | -0.21798800 |
| C  | 0.40994500  | 2.19611900  | -0.82625000 |
| C  | -2.76839100 | -1.83610000 | -0.56628100 |
| H  | -3.08287500 | -2.85999500 | -0.31021300 |
| H  | -2.87171400 | -1.74808600 | -1.66146900 |
| C  | 1.93307400  | -2.65526000 | -0.74267900 |
| H  | 2.90851100  | -2.29841900 | -0.43015500 |
| C  | 0.59549800  | 3.41561800  | -1.53951400 |



|   |             |             |             |   |             |             |             |
|---|-------------|-------------|-------------|---|-------------|-------------|-------------|
| H | -0.26930200 | 3.97700900  | -1.87075900 | N | 1.58390200  | 1.42513400  | -0.05019600 |
| C | -3.74271200 | -0.87879000 | 0.14082400  | N | 0.64139600  | -1.75313400 | -0.50359900 |
| H | -4.72453300 | -0.89681200 | -0.35803600 | C | 0.67202300  | 2.29081500  | -0.54255500 |
| H | -3.88455200 | -1.21378400 | 1.17318300  | C | -2.92528300 | -1.84443200 | -0.57431700 |
| C | 2.98607000  | 3.17617400  | -1.32574400 | H | -3.69791800 | -1.17603600 | -0.20994300 |
| H | 3.99973600  | 3.52156600  | -1.49315600 | C | -0.60440000 | -2.20952800 | -0.75425500 |
| C | -0.58685800 | -3.46893000 | -1.42316300 | C | 2.96732000  | 1.58131400  | -0.47406800 |
| H | -1.59150800 | -3.77933000 | -1.68170700 | H | 3.39488800  | 2.55041400  | -0.17329000 |
| C | -3.11696900 | 1.18446000  | -1.09324700 | H | 3.05552600  | 1.53360300  | -1.57318100 |
| H | -4.08565400 | 1.62826400  | -1.36917400 | C | -1.59493900 | 2.89320600  | -0.77811300 |
| H | -2.86733000 | 0.42550100  | -1.83796100 | H | -2.61896300 | 2.63148100  | -0.53492400 |
| C | 1.79834000  | -3.79335400 | -1.51866700 | C | -0.87304800 | -3.44332600 | -1.41376400 |
| H | 2.67711200  | -4.34383200 | -1.83457200 | H | -0.05071400 | -4.08257100 | -1.71035700 |
| C | 1.86881800  | 3.89128700  | -1.78535400 | C | 3.81733500  | 0.48986900  | 0.17932200  |
| H | 1.99862300  | 4.82502900  | -2.32687900 | H | 4.79041500  | 0.38681200  | -0.32337300 |
| C | 0.50054500  | -4.19865900 | -1.86379900 | H | 4.00173000  | 0.75444200  | 1.22489000  |
| H | 0.34354300  | -5.08503100 | -2.47346700 | C | -3.23879000 | -3.02957700 | -1.21781100 |
| C | -2.00469400 | 2.24502700  | -1.10202600 | H | -4.27483800 | -3.30832300 | -1.37261600 |
| H | -1.87490400 | 2.56376300  | -2.14662000 | C | 1.02725300  | 3.45315500  | -1.28971200 |
| H | -2.31415500 | 3.13976600  | -0.53589500 | H | 2.07016100  | 3.67063900  | -1.48002700 |
| C | -3.96998200 | 1.31429300  | 1.19507100  | C | 2.95473000  | -1.44063700 | -1.13727700 |
| H | -3.92118000 | 0.84198700  | 2.17926900  | H | 3.89209700  | -1.93951100 | -1.42469900 |
| H | -5.02435600 | 1.41870400  | 0.89462700  | H | 2.75072500  | -0.64389900 | -1.85545300 |
| H | -3.52264800 | 2.30817600  | 1.26922500  | C | -1.29997100 | 4.03687800  | -1.49861600 |

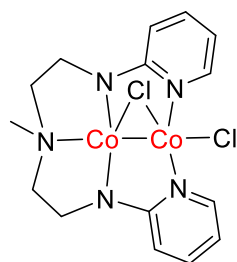

**2-B3LYP (0 5)**

E = -2069.21698216 au

|    |             |             |             |   |            |             |            |
|----|-------------|-------------|-------------|---|------------|-------------|------------|
| Co | -1.45801500 | 0.37626400  | 0.62376600  | C | 3.69815900 | -1.73935800 | 1.17530400 |
| Co | 1.20200800  | -0.32183700 | 0.66932500  | H | 3.69098300 | -1.28021500 | 2.16642600 |
| Cl | -0.15813100 | -0.15303300 | 2.56144300  | H | 4.73336200 | -1.98323900 | 0.89479300 |
| Cl | -3.60168600 | 0.98929700  | 1.18429900  | H | 3.11226500 | -2.65948200 | 1.21534200 |
| N  | -0.65959300 | 2.02874900  | -0.31921200 |   |            |             |            |
| N  | -1.65859800 | -1.42728700 | -0.35132000 |   |            |             |            |
| N  | 3.09617400  | -0.80849500 | 0.20066600  |   |            |             |            |



2-B3LYP (0 7)

E = -2069.24699780 au

|    |             |             |             |
|----|-------------|-------------|-------------|
| Co | -1.50882600 | 0.27264200  | 0.67426200  |
| Co | 1.21544700  | -0.23817700 | 0.70597800  |
| Cl | -0.10517500 | -0.25677300 | 2.62320300  |
| Cl | -3.64331100 | 0.75752800  | 1.33711100  |
| N  | -0.80499900 | 1.94685300  | -0.32359700 |
| N  | -1.58146500 | -1.48855700 | -0.37653200 |
| N  | 3.22431900  | -0.61342000 | 0.21905400  |
| N  | 1.47850300  | 1.50830100  | -0.08706500 |
| N  | 0.73566700  | -1.64881500 | -0.55103100 |
| C  | 0.50196000  | 2.29664600  | -0.58332200 |
| C  | -2.81967000 | -1.97561400 | -0.61811300 |
| H  | -3.63318200 | -1.37580500 | -0.22326100 |
| C  | -0.47571300 | -2.17823100 | -0.81737100 |
| C  | 2.85321500  | 1.76746900  | -0.48385600 |
| H  | 3.19708900  | 2.77006400  | -0.18434400 |
| H  | 2.96113400  | 1.72170600  | -1.58086000 |
| C  | -1.80772200 | 2.72405500  | -0.79639000 |
| H  | -2.80722700 | 2.39931800  | -0.52672400 |
| C  | -0.66939400 | -3.40128000 | -1.52338900 |
| H  | 0.19073600  | -3.97174100 | -1.85067900 |
| C  | 3.79750700  | 0.75366000  | 0.18293100  |
| H  | 4.77673000  | 0.75883200  | -0.32154900 |
| H  | 3.95778200  | 1.04444800  | 1.22625600  |
| C  | -3.05788400 | -3.15108600 | -1.30840200 |
| H  | -4.07368200 | -3.49205500 | -1.47211800 |
| C  | 0.75851800  | 3.46098600  | -1.36497600 |
| H  | 1.78093400  | 3.74736900  | -1.57560300 |
| C  | 3.06803300  | -1.23052800 | -1.12296100 |
| H  | 4.01292000  | -1.69422300 | -1.44527400 |
| H  | 2.82311500  | -0.43338600 | -1.82791500 |
| C  | -1.60812900 | 3.86292200  | -1.55623300 |

|   |             |             |             |
|---|-------------|-------------|-------------|
| H | -2.45600600 | 4.44279000  | -1.90235800 |
| C | -1.94511800 | -3.87437000 | -1.76377300 |
| H | -2.07899600 | -4.81209200 | -2.29746800 |
| C | -0.28516400 | 4.22972700  | -1.84233800 |
| H | -0.07390800 | 5.11742800  | -2.43339300 |
| C | 1.92216500  | -2.25293400 | -1.14209900 |
| H | 1.76140600  | -2.53091900 | -2.19417900 |
| H | 2.21730300  | -3.17667500 | -0.61567200 |
| C | 3.97465900  | -1.48892800 | 1.13260100  |
| H | 3.97066000  | -1.05759300 | 2.13687600  |
| H | 5.01637000  | -1.61718400 | 0.79899700  |
| H | 3.49457800  | -2.46916300 | 1.17780700  |

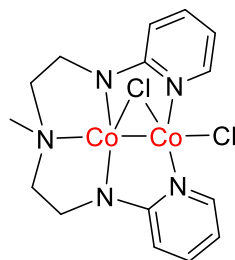

2-B3LYP (0 9)

E = -2069.13709661 au

|    |             |             |             |
|----|-------------|-------------|-------------|
| Co | -1.52974200 | 0.23011000  | 0.67092800  |
| Co | 1.21723400  | -0.22128700 | 0.70260200  |
| Cl | -0.03261800 | -0.21439400 | 2.63174300  |
| Cl | -3.66484400 | 0.49529500  | 1.43254900  |
| N  | -0.90311900 | 1.88782500  | -0.29738600 |
| N  | -1.49786400 | -1.54376600 | -0.40289900 |
| N  | 3.24305400  | -0.47370000 | 0.24037800  |
| N  | 1.39053700  | 1.56695800  | -0.19820700 |
| N  | 0.82482500  | -1.64327700 | -0.54467900 |
| C  | 0.37541900  | 2.32778100  | -0.63751800 |
| C  | -2.71846200 | -2.05366200 | -0.67822500 |
| H  | -3.55365600 | -1.48032100 | -0.28922900 |
| C  | -0.37290300 | -2.20264100 | -0.83559500 |
| C  | 2.76637700  | 1.85634700  | -0.58269400 |
| H  | 3.05116600  | 2.88778600  | -0.33674100 |
| H  | 2.87385400  | 1.75329400  | -1.67163300 |
| C  | -1.96060900 | 2.68850300  | -0.72344300 |
| H  | -2.94716200 | 2.36875000  | -0.41520600 |
| C  | -0.52040500 | -3.42257100 | -1.55208500 |

|   |             |             |             |   |             |             |             |
|---|-------------|-------------|-------------|---|-------------|-------------|-------------|
| H | 0.35880300  | -3.97139600 | -1.86538000 | N | 1.37271600  | 1.56235400  | -0.24055400 |
| C | 3.74220400  | 0.92013300  | 0.15083700  | N | 0.83253400  | -1.68263000 | -0.55367900 |
| H | 4.72905000  | 0.95667200  | -0.33621000 | C | 0.34753700  | 2.30781900  | -0.68427800 |
| H | 3.86815100  | 1.26743000  | 1.18155400  | C | -2.70775600 | -2.10866800 | -0.62054600 |
| C | -2.91610800 | -3.22621700 | -1.38922700 | H | -3.56159300 | -1.57806700 | -0.22056100 |
| H | -3.92099200 | -3.58594400 | -1.57841000 | C | -0.35886500 | -2.22904800 | -0.84628800 |
| C | 0.59156500  | 3.49840200  | -1.40789700 | C | 2.74856600  | 1.86932500  | -0.61145100 |
| H | 1.60609900  | 3.80194800  | -1.63143000 | H | 3.01267000  | 2.90796000  | -0.37459900 |
| C | 3.15116900  | -1.16160800 | -1.07609500 | H | 2.87652800  | 1.75380200  | -1.69701900 |
| H | 4.12411800  | -1.59844200 | -1.34583800 | C | -1.98918900 | 2.62816800  | -0.78937500 |
| H | 2.89676100  | -0.41127000 | -1.82747700 | H | -2.97311500 | 2.29390300  | -0.48792700 |
| C | -1.77808200 | 3.85612400  | -1.49194500 | C | -0.47728400 | -3.43374200 | -1.58477600 |
| H | -2.66936100 | 4.40914200  | -1.77888700 | H | 0.41938700  | -3.94583300 | -1.90939700 |
| C | -1.78103300 | -3.92201000 | -1.82576300 | C | 3.72592900  | 0.95958400  | 0.15297400  |
| H | -1.88269800 | -4.85734500 | -2.37035700 | H | 4.71792800  | 0.99199800  | -0.32194000 |
| C | -0.51808100 | 4.29633600  | -1.87369300 | H | 3.83487200  | 1.32624800  | 1.17861400  |
| H | -0.36057100 | 5.19153000  | -2.46152500 | C | -2.86119200 | -3.30622000 | -1.34748800 |
| C | 2.04600800  | -2.22898000 | -1.08004300 | H | -3.87411800 | -3.67165500 | -1.49873900 |
| H | 1.92396200  | -2.55220700 | -2.12365700 | C | 0.55376700  | 3.47525700  | -1.46518600 |
| H | 2.35992100  | -3.11958800 | -0.50969600 | H | 1.56522100  | 3.78471600  | -1.69474600 |
| C | 4.02395500  | -1.26401000 | 1.20770600  | C | 3.15910500  | -1.14202500 | -1.04956100 |
| H | 3.97025800  | -0.79301400 | 2.19233900  | H | 4.14013100  | -1.56075200 | -1.31487400 |
| H | 5.07784200  | -1.34219600 | 0.89990100  | H | 2.89224100  | -0.40430200 | -1.80898300 |
| H | 3.60091800  | -2.26822400 | 1.28325600  | C | -1.81982400 | 3.79392700  | -1.56521200 |

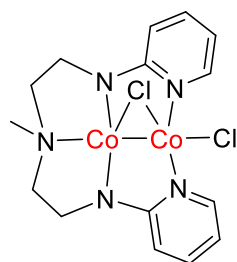

**2-B3LYP (0 11)**

E=-2069.02515171 au

|    |             |             |             |   |            |             |            |
|----|-------------|-------------|-------------|---|------------|-------------|------------|
| Co | -1.56025400 | 0.20623800  | 0.66447400  | C | 4.02989900 | -1.20983300 | 1.24244400 |
| Co | 1.21553300  | -0.18382600 | 0.71018200  | H | 3.97469600 | -0.72237100 | 2.21860500 |
| Cl | 0.01228700  | -0.13617600 | 2.64188300  | H | 5.08220600 | -1.28097200 | 0.93025800 |
| Cl | -3.64582500 | 0.54270700  | 1.50886000  | H | 3.61824700 | -2.21691200 | 1.33777600 |
| N  | -0.92172900 | 1.85387900  | -0.34029000 |   |            |             |            |
| N  | -1.46580800 | -1.53958400 | -0.35866400 |   |            |             |            |
| N  | 3.23841900  | -0.44070000 | 0.26366800  |   |            |             |            |

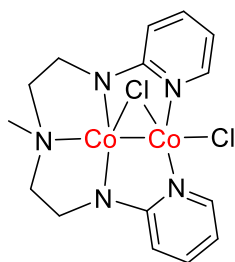

**2-TPSS (0 1)**

E = -2069.21644735 au

|    |             |             |             |
|----|-------------|-------------|-------------|
| Co | 0.97452400  | 0.11773900  | 1.13738600  |
| Co | -1.05736700 | -0.16996200 | 0.36160200  |
| Cl | -0.94055500 | 1.35027500  | 2.09966100  |
| Cl | 0.92994000  | -1.43130300 | 2.73720400  |
| N  | 1.68432400  | -1.11984000 | -0.08321800 |
| N  | 1.21914100  | 1.59007300  | -0.04840600 |
| N  | -2.93006000 | -0.51452600 | -0.36866300 |
| N  | -0.52729800 | -1.68380400 | -0.53832400 |
| N  | -0.87748500 | 1.15550600  | -0.92433700 |
| C  | 0.79013100  | -1.88249700 | -0.81366800 |
| C  | 2.36306600  | 2.31205900  | 0.00272200  |
| H  | 3.13737700  | 1.91191900  | 0.65707600  |
| C  | 0.17477200  | 2.00558900  | -0.84782800 |
| C  | -1.55538100 | -2.33003700 | -1.34928700 |
| H  | -1.44724200 | -3.42682700 | -1.33905500 |
| H  | -1.50435200 | -2.00646300 | -2.40551500 |
| C  | 3.01324300  | -1.28708200 | -0.25391300 |
| H  | 3.64677100  | -0.66799700 | 0.37749200  |
| C  | 0.28845800  | 3.24258700  | -1.54782100 |
| H  | -0.54894300 | 3.60717300  | -2.13669900 |
| C  | -2.90760700 | -1.96985700 | -0.71677700 |
| H  | -3.74974800 | -2.22734300 | -1.38109700 |
| H  | -3.02149600 | -2.51733100 | 0.22663000  |
| C  | 2.54602200  | 3.49854200  | -0.69810800 |
| H  | 3.48251700  | 4.04404800  | -0.61963900 |
| C  | 1.29383100  | -2.81380900 | -1.76164500 |
| H  | 0.59547700  | -3.40099000 | -2.35262500 |
| C  | -3.03041300 | 0.35433300  | -1.58779400 |
| H  | -4.08483800 | 0.59079300  | -1.79858800 |
| H  | -2.62005200 | -0.20676200 | -2.43393000 |
| C  | 3.55440900  | -2.19813600 | -1.15777500 |

|   |             |             |             |
|---|-------------|-------------|-------------|
| H | 4.63267700  | -2.29881800 | -1.24874900 |
| C | 1.46880900  | 3.96925900  | -1.47852500 |
| H | 1.55482400  | 4.90925700  | -2.02241500 |
| C | 2.66583000  | -2.97180600 | -1.92631300 |
| H | 3.04512100  | -3.69125200 | -2.65084500 |
| C | -2.18692200 | 1.61406900  | -1.37776400 |
| H | -2.11985800 | 2.15969400  | -2.33209000 |
| H | -2.65182000 | 2.28463900  | -0.63254100 |
| C | -4.00103500 | -0.19749500 | 0.60814200  |
| H | -3.82365700 | -0.76599700 | 1.52656000  |
| H | -4.99527500 | -0.44597400 | 0.19888500  |
| H | -3.95389300 | 0.86951600  | 0.84651900  |



**2-TPSS (0 3)**

E = -2069.25446883 au

|    |             |             |             |
|----|-------------|-------------|-------------|
| Co | -1.36224800 | 0.27775500  | 0.64984900  |
| Co | 1.09904100  | -0.22538400 | 0.53361400  |
| Cl | -0.01129900 | -0.23806100 | 2.56595200  |
| Cl | -3.51168700 | 0.73483000  | 1.33457700  |
| N  | -0.80198400 | 1.99352800  | -0.31018200 |
| N  | -1.55006500 | -1.48095200 | -0.38206100 |
| N  | 3.08411000  | -0.62873300 | 0.24384000  |
| N  | 1.46009900  | 1.47298000  | -0.19694000 |
| N  | 0.75052600  | -1.70960700 | -0.56798900 |
| C  | 0.50026100  | 2.33873500  | -0.61221000 |
| C  | -2.80935000 | -1.93679800 | -0.59856000 |
| H  | -3.59711300 | -1.28983500 | -0.21790400 |
| C  | -0.47754200 | -2.23826700 | -0.80630800 |
| C  | 2.85162300  | 1.71698500  | -0.57221000 |
| H  | 3.18922700  | 2.73099600  | -0.29834800 |
| H  | 2.98412600  | 1.62083300  | -1.66599500 |
| C  | -1.81059000 | 2.82205400  | -0.68286800 |
| H  | -2.80280100 | 2.49277700  | -0.38113100 |
| C  | -0.70472000 | -3.48759000 | -1.45166900 |

|   |             |             |             |   |             |             |             |
|---|-------------|-------------|-------------|---|-------------|-------------|-------------|
| H | 0.14162100  | -4.09888100 | -1.75412600 | N | 2.04490800  | 0.46309800  | -0.21450600 |
| C | 3.73447800  | 0.71313700  | 0.18412200  | N | -0.33761900 | -1.85284500 | -0.62173700 |
| H | 4.73998400  | 0.64479700  | -0.26553100 | C | 1.73012000  | 1.72975200  | -0.59773200 |
| H | 3.84115100  | 1.04314200  | 1.22439400  | C | -3.40821000 | -0.06195200 | -0.57372700 |
| C | -3.08810100 | -3.13873200 | -1.24504900 | H | -3.68305400 | 0.92452500  | -0.20618100 |
| H | -4.11908300 | -3.44919700 | -1.39336000 | C | -1.66680900 | -1.62597000 | -0.80930500 |
| C | 0.76140600  | 3.53906800  | -1.33489100 | C | 3.33353100  | -0.12825500 | -0.57125100 |
| H | 1.78514300  | 3.80456200  | -1.58478500 | H | 4.18209300  | 0.51926700  | -0.29392900 |
| C | 3.07948100  | -1.34383800 | -1.06634400 | H | 3.39952000  | -0.29688900 | -1.66198500 |
| H | 4.06100700  | -1.80944700 | -1.26006700 | C | 0.04356400  | 3.37428300  | -0.63627800 |
| H | 2.88162800  | -0.59558100 | -1.84184100 | H | -0.97532300 | 3.61907800  | -0.34361000 |
| C | -1.60997200 | 4.00649100  | -1.38693700 | C | -2.57231200 | -2.55824700 | -1.38129700 |
| H | -2.45974200 | 4.62649100  | -1.66029800 | H | -2.22213200 | -3.54852700 | -1.66269500 |
| C | -2.00448500 | -3.92721800 | -1.67225700 | C | 3.47066700  | -1.44265600 | 0.21075000  |
| H | -2.17599600 | -4.88384500 | -2.16499800 | H | 4.26316300  | -2.08558800 | -0.20713900 |
| C | -0.29034100 | 4.36150600  | -1.71966800 | H | 3.72019600  | -1.21138400 | 1.25232900  |
| H | -0.08595200 | 5.27730400  | -2.27371700 | C | -4.33598200 | -0.92084400 | -1.16135000 |
| C | 1.94469000  | -2.37917500 | -1.08222000 | H | -5.36746400 | -0.60052500 | -1.28405100 |
| H | 1.80485600  | -2.72182900 | -2.12052600 | C | 2.61708300  | 2.62025500  | -1.26070800 |
| H | 2.20772200  | -3.26807000 | -0.48042500 | H | 3.62825500  | 2.29847000  | -1.49721600 |
| C | 3.68031300  | -1.46297400 | 1.31516900  | C | 1.80949500  | -2.85622100 | -1.02662100 |
| H | 3.56198200  | -0.94602200 | 2.27256600  | H | 2.37573700  | -3.79632400 | -1.13608000 |
| H | 4.75049000  | -1.65068000 | 1.12141600  | H | 2.08726300  | -2.17566400 | -1.83981000 |
| H | 3.14738800  | -2.41743100 | 1.36689800  | C | 0.86788900  | 4.28878300  | -1.28917800 |

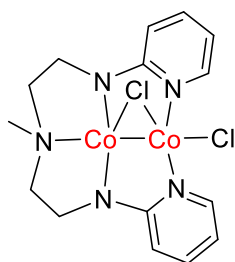

**2-TPSS (0 5)**

E = -2069.24696242 au

|    |             |             |             |   |            |             |            |
|----|-------------|-------------|-------------|---|------------|-------------|------------|
| Co | -0.92238900 | 0.93360600  | 0.62032200  | C | 2.11884700 | -3.11361700 | 1.40620000 |
| Co | 0.75565500  | -0.73423800 | 0.35608500  | H | 2.26040300 | -2.54409500 | 2.32886200 |
| Cl | -0.05456500 | -0.32227000 | 2.50198600  | H | 2.90048900 | -3.88605500 | 1.31034100 |
| Cl | -2.46821500 | 2.48065200  | 1.39060000  | H | 1.13407500 | -3.58801400 | 1.44184600 |
| N  | 0.44259700  | 2.12095200  | -0.30280100 |   |            |             |            |
| N  | -2.10285300 | -0.38644200 | -0.39935700 |   |            |             |            |
| N  | 2.16602200  | -2.17485000 | 0.25624100  |   |            |             |            |

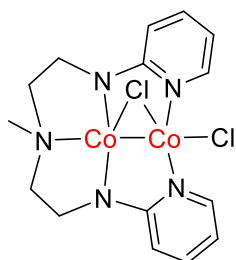

**2-TPSS (0 7)**

E = -2069.26833657 au

|    |             |             |             |
|----|-------------|-------------|-------------|
| Co | -1.39537000 | 0.39591600  | 0.66391900  |
| Co | 1.14409100  | -0.35125100 | 0.71511000  |
| Cl | -0.13954500 | -0.35248200 | 2.63453100  |
| Cl | -3.43261400 | 1.13526200  | 1.39697200  |
| N  | -0.59453400 | 1.98623900  | -0.33892600 |
| N  | -1.75531000 | -1.30635700 | -0.36040300 |
| N  | 3.09417100  | -0.92712100 | 0.19451900  |
| N  | 1.63391400  | 1.35623400  | -0.02824200 |
| N  | 0.53366100  | -1.64488000 | -0.60003800 |
| C  | 0.74826100  | 2.23716400  | -0.55771400 |
| C  | -3.04346700 | -1.68245700 | -0.55846600 |
| H  | -3.78275400 | -1.01541100 | -0.11870000 |
| C  | -0.72584500 | -2.08150400 | -0.85463900 |
| C  | 3.04684300  | 1.51145700  | -0.36690500 |
| H  | 3.46791300  | 2.45932000  | 0.01147000  |
| H  | 3.18858800  | 1.51959300  | -1.46361400 |
| C  | -1.52223500 | 2.83883400  | -0.84843800 |
| H  | -2.55268700 | 2.58669000  | -0.60499400 |
| C  | -1.04160800 | -3.26520500 | -1.58623800 |
| H  | -0.23997100 | -3.89333800 | -1.96549100 |
| C  | 3.84670100  | 0.35790800  | 0.26619800  |
| H  | 4.83791100  | 0.26653800  | -0.21167100 |
| H  | 3.99915800  | 0.55921800  | 1.33436500  |
| C  | -3.40148300 | -2.82715300 | -1.26357200 |
| H  | -4.44967500 | -3.08320400 | -1.39329700 |
| C  | 1.12602300  | 3.38280600  | -1.32093000 |
| H  | 2.17955600  | 3.59184200  | -1.48542600 |
| C  | 2.88294700  | -1.41397600 | -1.19916100 |
| H  | 3.78280800  | -1.93426400 | -1.57072100 |
| H  | 2.69955200  | -0.53570200 | -1.82701400 |
| C  | -1.20370800 | 3.96241300  | -1.60337600 |

|   |             |             |             |
|---|-------------|-------------|-------------|
| H | -1.99330700 | 4.60713000  | -1.98016900 |
| C | -2.36781500 | -3.62833700 | -1.78451600 |
| H | -2.60052900 | -4.53874600 | -2.33642700 |
| C | 0.15724600  | 4.23237600  | -1.83777600 |
| H | 0.45698100  | 5.10601200  | -2.41606700 |
| C | 1.64611300  | -2.32324600 | -1.27013100 |
| H | 1.42959400  | -2.50508700 | -2.33628600 |
| H | 1.85602400  | -3.30772600 | -0.81249800 |
| C | 3.72311500  | -1.96313200 | 1.04383600  |
| H | 3.77065700  | -1.59888200 | 2.07574700  |
| H | 4.74161100  | -2.20382000 | 0.69244800  |
| H | 3.10999400  | -2.86988100 | 1.02161300  |

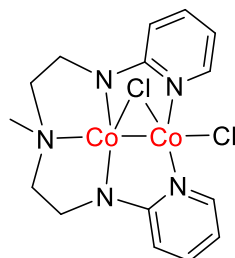

**2-TPSS (0 9)**

E = -2069.16398156 au

|    |             |             |             |
|----|-------------|-------------|-------------|
| Co | -1.42282300 | 0.23632200  | 0.75395700  |
| Co | 1.21161900  | -0.22296900 | 0.75079400  |
| Cl | 0.03451700  | -0.28658800 | 2.70600900  |
| Cl | -3.44059000 | 0.79014700  | 1.64732400  |
| N  | -0.86029200 | 1.84411900  | -0.35748700 |
| N  | -1.58216000 | -1.43715900 | -0.29619400 |
| N  | 3.19194400  | -0.57778400 | 0.19927900  |
| N  | 1.42704300  | 1.45385700  | -0.15581100 |
| N  | 0.70380100  | -1.58921200 | -0.61668200 |
| C  | 0.42913500  | 2.21589400  | -0.69219300 |
| C  | -2.85590100 | -1.94370300 | -0.51437000 |
| H  | -3.65651600 | -1.41627400 | -0.00400000 |
| C  | -0.51664500 | -2.10840600 | -0.91288500 |
| C  | 2.81029500  | 1.80487100  | -0.46725000 |
| H  | 3.07073800  | 2.81897900  | -0.11905000 |
| H  | 2.97527100  | 1.79598700  | -1.56010100 |
| C  | -1.90354300 | 2.56618400  | -0.86008600 |
| H  | -2.88656500 | 2.23801300  | -0.52881200 |
| C  | -0.71919200 | -3.23396400 | -1.74039800 |

|   |             |             |             |   |             |             |             |
|---|-------------|-------------|-------------|---|-------------|-------------|-------------|
| H | 0.13913300  | -3.74337700 | -2.16999100 | N | 1.60375800  | 1.34389900  | -0.13040000 |
| C | 3.75716100  | 0.80494600  | 0.22294900  | N | 0.60753100  | -1.64842500 | -0.64663300 |
| H | 4.75644600  | 0.83189300  | -0.24453900 | C | 0.69373100  | 2.20015500  | -0.67459500 |
| H | 3.86684800  | 1.06723200  | 1.28293200  | C | -2.97570100 | -1.78640100 | -0.42375000 |
| C | -3.09421200 | -3.05909500 | -1.33115000 | H | -3.73656200 | -1.19586800 | 0.07780800  |
| H | -4.12504300 | -3.38959000 | -1.45445500 | C | -0.65465000 | -2.10268300 | -0.89023200 |
| C | 0.65057200  | 3.32958300  | -1.54171200 | C | 3.02876000  | 1.55081300  | -0.36465800 |
| H | 1.66703300  | 3.62683200  | -1.78563500 | H | 3.36054000  | 2.52439700  | 0.02990700  |
| C | 3.03492500  | -1.12464400 | -1.18179800 | H | 3.23184100  | 1.56147400  | -1.44854600 |
| H | 3.98313800  | -1.56264100 | -1.53593400 | C | -1.61517000 | 2.51962800  | -1.19263800 |
| H | 2.76812000  | -0.29096600 | -1.83899800 | H | -2.63611900 | 2.16363400  | -1.08678800 |
| C | -1.73879700 | 3.65797200  | -1.70812700 | C | -0.94335700 | -3.24306200 | -1.65364100 |
| H | -2.61273400 | 4.19317900  | -2.07143000 | H | -0.12177400 | -3.81471100 | -2.07888600 |
| C | -2.04143500 | -3.73604300 | -1.97298500 | C | 3.81573900  | 0.43335400  | 0.34128900  |
| H | -2.21048800 | -4.60353100 | -2.60391200 | H | 4.83143600  | 0.34447000  | -0.07922100 |
| C | -0.43368600 | 4.04995600  | -2.05402500 | H | 3.90643900  | 0.65981700  | 1.41110700  |
| H | -0.26107200 | 4.90523000  | -2.70531400 | C | -3.29054500 | -2.92244400 | -1.17204700 |
| C | 1.90184300  | -2.16203000 | -1.23555100 | H | -4.33993700 | -3.20952000 | -1.23548000 |
| H | 1.72953000  | -2.42443700 | -2.28966500 | C | 1.03510900  | 3.35049500  | -1.39556400 |
| H | 2.18553600  | -3.08888700 | -0.70804900 | H | 2.08417900  | 3.61444500  | -1.50726300 |
| C | 3.97770800  | -1.49038100 | 1.06245400  | C | 2.96501200  | -1.37329500 | -1.14740500 |
| H | 3.98239600  | -1.09866000 | 2.08505300  | H | 3.89363800  | -1.88410000 | -1.45112200 |
| H | 5.01504800  | -1.58448300 | 0.69895200  | H | 2.81132800  | -0.50808700 | -1.79986000 |
| H | 3.50721600  | -2.47911400 | 1.06904300  | C | -1.30944800 | 3.68212700  | -1.90300500 |



**2-TPSS (0 11)**

E = -2069.05361013 au

|    |             |             |             |   |            |             |            |
|----|-------------|-------------|-------------|---|------------|-------------|------------|
| Co | -1.45045500 | 0.40447800  | 0.66556700  | C | 3.67641600 | -1.87912500 | 1.15520900 |
| Co | 1.07745400  | -0.33500000 | 0.73861700  | H | 3.66105700 | -1.49919800 | 2.18263200 |
| Cl | -0.03844400 | 0.00447200  | 2.69835000  | H | 4.71575200 | -2.10574800 | 0.86522700 |
| Cl | -3.37363000 | 1.08934900  | 1.61346400  | H | 3.08130700 | -2.79698700 | 1.11036400 |
| N  | -0.64547100 | 1.78458900  | -0.49035100 |   |            |             |            |
| N  | -1.66697500 | -1.31863400 | -0.27448500 |   |            |             |            |
| N  | 3.08315100  | -0.86334500 | 0.25136200  |   |            |             |            |



**2-B3PW91 (0 7)**

E = -2068.87842283 au

|    |             |             |             |
|----|-------------|-------------|-------------|
| Co | -1.47590600 | 0.30584900  | 0.67375300  |
| Co | 1.19672000  | -0.26813500 | 0.70287200  |
| Cl | -0.10951800 | -0.28585400 | 2.61014800  |
| Cl | -3.57519900 | 0.85761100  | 1.35623700  |
| N  | -0.74350700 | 1.94486700  | -0.32583700 |
| N  | -1.62089000 | -1.43322100 | -0.36927400 |
| N  | 3.17898500  | -0.69396800 | 0.21348600  |
| N  | 1.51880500  | 1.46392000  | -0.06725900 |
| N  | 0.68094500  | -1.63732200 | -0.56746300 |
| C  | 0.56678700  | 2.26983300  | -0.57231000 |
| C  | -2.86929600 | -1.88828000 | -0.59486200 |
| H  | -3.66259100 | -1.27092000 | -0.18241400 |
| C  | -0.53960600 | -2.13937900 | -0.82702500 |
| C  | 2.89682900  | 1.69653800  | -0.44155500 |
| H  | 3.26292600  | 2.68410800  | -0.11736700 |
| H  | 3.01876600  | 1.67081600  | -1.53842500 |
| C  | -1.72645300 | 2.73196400  | -0.81131400 |
| H  | -2.73425400 | 2.42275900  | -0.54822200 |
| C  | -0.76560800 | -3.34765600 | -1.54164500 |
| H  | 0.07903300  | -3.93263600 | -1.88616900 |
| C  | 3.79734500  | 0.64545700  | 0.21506000  |
| H  | 4.78469400  | 0.62919800  | -0.27381200 |
| H  | 3.95060100  | 0.91023000  | 1.26709400  |
| C  | -3.14219900 | -3.05091100 | -1.29060200 |
| H  | -4.16739400 | -3.36921100 | -1.44288400 |
| C  | 0.85298400  | 3.42595300  | -1.34932700 |
| H  | 1.88378900  | 3.69569500  | -1.54562000 |
| C  | 3.00588200  | -1.26433500 | -1.13803500 |
| H  | 3.93936800  | -1.73632800 | -1.48247000 |
| H  | 2.77005700  | -0.44064100 | -1.81655300 |
| C  | -1.50116700 | 3.86307000  | -1.57231900 |

|   |             |             |             |
|---|-------------|-------------|-------------|
| H | -2.33606000 | 4.45476300  | -1.93064700 |
| C | -2.05282000 | -3.79072500 | -1.76802600 |
| H | -2.21385300 | -4.72027800 | -2.30920600 |
| C | -0.17132000 | 4.20808600  | -1.84157300 |
| H | 0.06115700  | 5.09155600  | -2.43166400 |
| C | 1.84146100  | -2.25536000 | -1.17820100 |
| H | 1.66728000  | -2.50173500 | -2.23674900 |
| H | 2.11592500  | -3.20074300 | -0.67873000 |
| C | 3.88616100  | -1.61581200 | 1.10396300  |
| H | 3.89677000  | -1.20809000 | 2.11834100  |
| H | 4.92302000  | -1.78142100 | 0.77128800  |
| H | 3.36476400  | -2.57585500 | 1.12785900  |

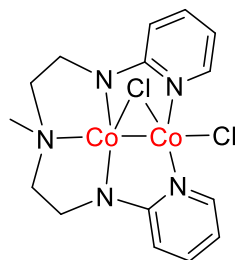

**2-PBE0 (0 7)**

E = -2067.74331567 au

|    |             |             |             |
|----|-------------|-------------|-------------|
| Co | -1.49612000 | 0.30234600  | 0.66848500  |
| Co | 1.20558000  | -0.26287500 | 0.70800100  |
| Cl | -0.12263000 | -0.25612600 | 2.60748000  |
| Cl | -3.61568000 | 0.83821800  | 1.30543500  |
| N  | -0.74801200 | 1.95250500  | -0.32382000 |
| N  | -1.60901300 | -1.45540300 | -0.36781800 |
| N  | 3.19055700  | -0.67933600 | 0.21670200  |
| N  | 1.51391400  | 1.47205800  | -0.07459100 |
| N  | 0.69289500  | -1.65084700 | -0.55056200 |
| C  | 0.55978400  | 2.27758300  | -0.57273800 |
| C  | -2.85158900 | -1.91965500 | -0.59866100 |
| H  | -3.65227500 | -1.30340900 | -0.19786400 |
| C  | -0.52299700 | -2.15944600 | -0.81160600 |
| C  | 2.88666300  | 1.70366400  | -0.45941900 |
| H  | 3.25471200  | 2.69421500  | -0.14575800 |
| H  | 3.00211500  | 1.67068000  | -1.55718000 |
| C  | -1.72962000 | 2.74517700  | -0.79883500 |
| H  | -2.73777200 | 2.43670000  | -0.53439900 |
| C  | -0.73763400 | -3.37459000 | -1.51655700 |



|   |             |             |             |    |             |            |            |
|---|-------------|-------------|-------------|----|-------------|------------|------------|
| H | 0.11259100  | -3.95856400 | -1.84913000 | Co | 10.59684000 | 5.92389100 | 5.97642500 |
| C | 3.79620400  | 0.66336800  | 0.19865300  | O  | 10.49345200 | 5.46504900 | 4.07711100 |
| H | 4.78004200  | 0.64896400  | -0.29775800 | N  | 12.70112500 | 3.59224800 | 6.26016800 |
| H | 3.95738400  | 0.94000200  | 1.24678200  | N  | 13.15276800 | 5.74203100 | 4.61252000 |
| C | -3.11489300 | -3.08811800 | -1.28559500 | N  | 11.74459900 | 5.35572700 | 7.47008700 |
| H | -4.13760100 | -3.41186700 | -1.44216000 | C  | 12.40530000 | 4.17534300 | 7.48558700 |
| C | 0.84423900  | 3.43579500  | -1.34589900 | C  | 13.45377500 | 2.46788200 | 6.19810700 |
| H | 1.87462700  | 3.70380900  | -1.54701700 | H  | 13.61685500 | 2.09165600 | 5.19002800 |
| C | 3.01244000  | -1.26458900 | -1.12569600 | N  | 11.69031700 | 7.35944800 | 5.40854100 |
| H | 3.94818900  | -1.73184800 | -1.47115900 | C  | 14.36280900 | 5.35863000 | 4.13919100 |
| H | 2.76585400  | -0.44981900 | -1.81201200 | H  | 14.43432900 | 4.30611200 | 3.87836900 |
| C | -1.50740200 | 3.88009200  | -1.55268700 | N  | 9.84249700  | 7.33489600 | 7.29520400 |
| H | -2.34340700 | 4.47513400  | -1.90240400 | C  | 15.22806600 | 7.58998100 | 4.34414300 |
| C | -2.01950600 | -3.82582500 | -1.74807100 | H  | 16.03924500 | 8.31168800 | 4.25117600 |
| H | -2.17160400 | -4.76099500 | -2.28203300 | C  | 13.99439700 | 7.99953000 | 4.83355500 |
| C | -0.17964000 | 4.22251600  | -1.82761700 | H  | 13.82773500 | 9.03333100 | 5.12815500 |
| H | 0.05217600  | 5.10829000  | -2.41443700 | C  | 12.83004100 | 3.49736600 | 8.67323000 |
| C | 1.85747100  | -2.26522000 | -1.15157100 | H  | 12.54932000 | 3.89128200 | 9.64586700 |
| H | 1.68724000  | -2.52638600 | -2.20741500 | C  | 12.92737200 | 7.06103100 | 4.96945700 |
| H | 2.14144200  | -3.20252400 | -0.64141000 | C  | 15.42597700 | 6.24319300 | 3.98139300 |
| C | 3.91903700  | -1.58273000 | 1.10486400  | H  | 16.37574900 | 5.88247200 | 3.59590700 |
| H | 3.93654600  | -1.16821200 | 2.11654000  | C  | 13.94052600 | 1.81632500 | 7.32474400 |
| H | 4.95435100  | -1.73534800 | 0.76145300  | H  | 14.53369100 | 0.91141300 | 7.22012100 |
| H | 3.41352800  | -2.55107400 | 1.14192600  | C  | 13.59760700 | 2.34559400 | 8.58624300 |

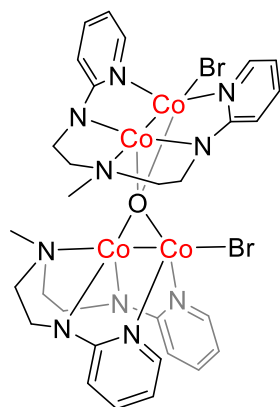

**3-TPSS (0 1)**

E = -2399.65664807 au

|    |             |            |            |
|----|-------------|------------|------------|
| Br | 12.11404800 | 2.79653400 | 3.00355400 |
| Co | 11.82940900 | 4.42554200 | 4.77077700 |

C 10.76612500 7.29668100 8.47829200

|    |            |            |            |
|----|------------|------------|------------|
| H  | 10.2616000 | 7.7308040  | 9.3560460  |
| H  | 11.6460820 | 7.9035940  | 8.2468160  |
| Br | 9.0318320  | 4.0431730  | 6.5003030  |
| Co | 8.6805690  | 5.5052240  | 4.4588220  |
| Co | 9.7144150  | 6.9099710  | 3.1725110  |
| N  | 8.0602940  | 4.4474630  | 3.0154100  |
| N  | 7.1359310  | 6.6218510  | 4.5958630  |
| N  | 9.2078210  | 5.9311130  | 1.6603400  |
| C  | 8.6621130  | 4.6989110  | 1.7977330  |
| C  | 7.3678200  | 3.3012790  | 3.2137680  |
| H  | 6.9456470  | 3.1847620  | 4.2096440  |
| N  | 8.3617810  | 8.1922360  | 3.3728960  |
| C  | 5.9816610  | 6.2183850  | 5.1851510  |
| H  | 6.0546630  | 5.2722230  | 5.7199540  |
| N  | 10.5995850 | 8.2562080  | 1.8459020  |
| C  | 4.7937160  | 8.1530390  | 4.4057810  |
| H  | 3.8821910  | 8.7436030  | 4.3197520  |
| C  | 5.9606080  | 8.5866170  | 3.7863240  |
| H  | 5.9665790  | 9.5074400  | 3.2074460  |
| C  | 8.6286090  | 3.6879010  | 0.7928330  |
| H  | 9.1910530  | 3.8224700  | -0.1267950 |
| C  | 7.1583990  | 7.8241680  | 3.8921520  |
| C  | 4.7964800  | 6.9447020  | 5.1319610  |
| H  | 3.9053470  | 6.5732160  | 5.6320800  |
| C  | 7.2284830  | 2.3270390  | 2.2327810  |
| H  | 6.6520660  | 1.4276220  | 2.4328380  |
| C  | 7.9000970  | 2.5272440  | 1.0080950  |
| H  | 7.8706320  | 1.7602450  | 0.2349370  |
| C  | 10.0740820 | 6.2376190  | 0.5268650  |
| H  | 9.6336960  | 5.8905870  | -0.4215050 |
| H  | 11.0667340 | 5.7644860  | 0.6336090  |
| C  | 8.4616740  | 9.3604630  | 2.5045340  |
| H  | 8.0894130  | 10.2792940 | 2.9909530  |
| H  | 7.8705400  | 9.2237870  | 1.5801900  |
| C  | 12.0745280 | 8.3578170  | 1.9193070  |
| H  | 12.3632560 | 8.6668130  | 2.9264110  |
| H  | 12.4618670 | 9.0867150  | 1.1845010  |
| H  | 12.5104420 | 7.3731890  | 1.7220790  |
| C  | 9.9519440  | 9.5597180  | 2.1825220  |

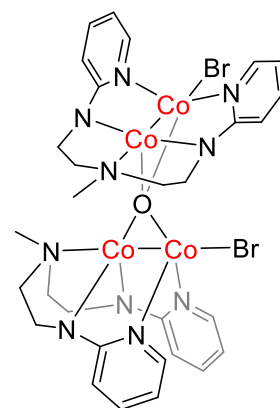

**3-TPSS (0 3)**

E = -2399.75320943 au

|    |            |            |           |
|----|------------|------------|-----------|
| Br | 12.9945560 | 3.7285490  | 2.5435620 |
| Co | 12.3230320 | 4.8868090  | 4.5872730 |
| Co | 10.6095610 | 6.3577400  | 6.0844770 |
| O  | 10.4880490 | 5.3555670  | 4.5028950 |
| N  | 12.4649380 | 3.6827580  | 6.1852280 |
| N  | 13.3386680 | 6.6601260  | 4.4937130 |
| N  | 11.4010740 | 5.3030200  | 7.4846400 |
| C  | 11.9516510 | 4.0651400  | 7.4088960 |
| C  | 13.0218830 | 2.4556440  | 6.0395900 |
| H  | 13.3759590 | 2.2339090  | 5.0337990 |
| N  | 11.6215690 | 7.9065850  | 5.5048210 |
| C  | 14.5608730 | 6.6042160  | 3.9083460 |
| H  | 14.8655700 | 5.6080490  | 3.5920300 |
| N  | 9.9035710  | 7.5488810  | 7.5361890 |
| C  | 14.8710140 | 8.9709520  | 4.0807980 |
| H  | 15.4562710 | 9.8757870  | 3.9163670 |
| C  | 13.6198980 | 9.0614860  | 4.6756780 |
| H  | 13.2280600 | 10.0319650 | 4.9685270 |
| C  | 12.0428500 | 3.1605790  | 8.5092660 |
| H  | 11.6104830 | 3.4364140  | 9.4671720 |
| C  | 12.8346080 | 7.8837510  | 4.9043530 |

|    |             |            |            |   |             |             |             |
|----|-------------|------------|------------|---|-------------|-------------|-------------|
| C  | 15.37059700 | 7.71426800 | 3.68765000 | C | 8.52749500  | 3.14921000  | 0.68463500  |
| H  | 16.34409800 | 7.59879900 | 3.21838400 | H | 8.91967300  | 3.38823000  | -0.30034900 |
| C  | 13.13957300 | 1.54124700 | 7.08119100 | C | 7.61937200  | 7.81648200  | 4.13615800  |
| H  | 13.59821900 | 0.57087200 | 6.90942800 | C | 5.18638700  | 7.36819200  | 5.46808700  |
| C  | 12.63272100 | 1.91547300 | 8.34134900 | H | 4.25823800  | 7.15000000  | 5.98998100  |
| H  | 12.68298000 | 1.22485100 | 9.18296000 | C | 7.43256900  | 1.61323400  | 2.20574700  |
| C  | 11.08193100 | 5.82582100 | 8.81511100 | H | 6.94556800  | 0.66636100  | 2.42396200  |
| H  | 11.91306000 | 5.65906500 | 9.52039900 | C | 7.90034700  | 1.93375000  | 0.91464100  |
| H  | 10.18431100 | 5.34567200 | 9.24453100 | H | 7.78411200  | 1.22420900  | 0.09548700  |
| C  | 11.23956500 | 9.15214400 | 6.17173800 | C | 9.74205000  | 5.76508200  | 0.32761500  |
| H  | 11.06446300 | 9.98057300 | 5.46027500 | H | 9.00676600  | 5.56772200  | -0.47117300 |
| H  | 12.04298900 | 9.48772100 | 6.85344600 | H | 10.68748600 | 5.27343700  | 0.03811900  |
| C  | 8.51902100  | 7.22728000 | 7.97690100 | C | 9.10921400  | 9.15153200  | 2.75840800  |
| H  | 7.83711500  | 7.38460600 | 7.13860300 | H | 9.11449200  | 10.05750700 | 3.39248500  |
| H  | 8.22945000  | 7.87756800 | 8.82006300 | H | 8.34563900  | 9.32209900  | 1.97630600  |
| H  | 8.46076600  | 6.17618600 | 8.26960900 | C | 12.20787200 | 7.45878500  | 1.29295700  |
| C  | 9.93598200  | 8.91688000 | 6.94065300 | H | 12.80217400 | 7.75041400  | 2.16161500  |
| H  | 9.09017600  | 8.95448700 | 6.24434800 | H | 12.50021600 | 8.07620400  | 0.42564200  |
| H  | 9.78516500  | 9.68687600 | 7.71680100 | H | 12.39973200 | 6.40176200  | 1.08400000  |
| C  | 10.87097900 | 7.33514200 | 8.65203600 | C | 10.51205800 | 9.02260700  | 2.12970400  |
| H  | 10.50315900 | 7.80596100 | 9.57988200 | H | 11.27237400 | 9.18966400  | 2.90211900  |
| H  | 11.82020500 | 7.79829200 | 8.36022100 | H | 10.64815100 | 9.77983500  | 1.33739200  |
| Br | 8.14853300  | 3.72081300 | 6.66791600 | C | 9.91802100  | 7.29056600  | 0.42760100  |
| Co | 8.59224900  | 4.93962900 | 4.60968800 | H | 10.35522500 | 7.70825300  | -0.49550600 |
| Co | 9.92387100  | 6.42901700 | 3.05068300 | H | 8.93061700  | 7.73988400  | 0.58549800  |
| N  | 8.24326400  | 3.74253800 | 3.01721300 |   |             |             |             |
| N  | 7.34816600  | 6.58049500 | 4.70496800 |   |             |             |             |
| N  | 9.27332600  | 5.29621000 | 1.63052600 |   |             |             |             |
| C  | 8.69482500  | 4.08299300 | 1.75288900 |   |             |             |             |
| C  | 7.64050700  | 2.54444900 | 3.21681700 |   |             |             |             |
| H  | 7.33789300  | 2.35337800 | 4.24525500 |   |             |             |             |
| N  | 8.81165200  | 7.94104700 | 3.51718600 |   |             |             |             |
| C  | 6.16427700  | 6.38640500 | 5.33861500 |   |             |             |             |
| H  | 6.03809500  | 5.39467900 | 5.77031100 |   |             |             |             |
| N  | 10.76942500 | 7.64820200 | 1.60651100 |   |             |             |             |
| C  | 5.44974300  | 8.63434300 | 4.90783900 |   |             |             |             |
| H  | 4.71568100  | 9.43621800 | 4.98663200 |   |             |             |             |
| C  | 6.65065900  | 8.86199000 | 4.24913700 |   |             |             |             |
| H  | 6.86252800  | 9.83336800 | 3.80848600 |   |             |             |             |

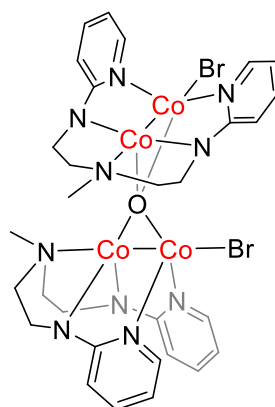

**3-TPSS (0 5)**

E = -2399.73817614 au

Br 12.80636600 3.75514400 2.43049900

|    |             |             |            |    |             |             |             |
|----|-------------|-------------|------------|----|-------------|-------------|-------------|
| Co | 12.19958200 | 4.94324500  | 4.48011500 | C  | 10.80226700 | 7.36104400  | 8.58713700  |
| Co | 10.56873100 | 6.43788300  | 5.99321600 | H  | 10.42867500 | 7.82886600  | 9.51424200  |
| O  | 10.32125400 | 5.26165400  | 4.56692500 | H  | 11.78569500 | 7.77694400  | 8.34050000  |
| N  | 12.32953300 | 3.72094100  | 6.07447400 | Br | 7.89488700  | 3.65952900  | 6.70237900  |
| N  | 13.30676900 | 6.65048300  | 4.38905400 | Co | 8.45644700  | 4.87150100  | 4.65369500  |
| N  | 11.27625200 | 5.33792900  | 7.38797000 | Co | 10.02952300 | 6.42663500  | 3.13977700  |
| C  | 11.78244300 | 4.08255500  | 7.28957300 | N  | 8.37407500  | 3.64413500  | 3.05985300  |
| C  | 12.86290600 | 2.48531100  | 5.91638700 | N  | 7.28695300  | 6.53621500  | 4.74654000  |
| H  | 13.24553000 | 2.27946900  | 4.91777800 | N  | 9.36647100  | 5.29860200  | 1.74552200  |
| N  | 11.67274300 | 7.95257900  | 5.45309300 | C  | 8.90836700  | 4.02499800  | 1.84491300  |
| C  | 14.51784700 | 6.53966700  | 3.78783600 | C  | 7.88731400  | 2.38947700  | 3.21846600  |
| H  | 14.75377700 | 5.54024900  | 3.42639000 | H  | 7.51181400  | 2.17023000  | 4.21691700  |
| N  | 9.88773900  | 7.65799700  | 7.44631100 | N  | 8.86897900  | 7.89848300  | 3.67917300  |
| C  | 14.98470600 | 8.87079900  | 4.06638700 | C  | 6.08167000  | 6.38005800  | 5.34935300  |
| H  | 15.62817900 | 9.74129500  | 3.93844000 | H  | 5.88452600  | 5.37279700  | 5.71226600  |
| C  | 13.74854300 | 9.01561000  | 4.68192400 | N  | 10.66397900 | 7.67061100  | 1.68580100  |
| H  | 13.42696000 | 9.99412200  | 5.02828600 | C  | 5.52582200  | 8.69130100  | 5.06856000  |
| C  | 11.80033900 | 3.14348300  | 8.36386700 | H  | 4.84970200  | 9.53675100  | 5.19610200  |
| H  | 11.32851600 | 3.40137300  | 9.30796600 | C  | 6.75484000  | 8.88240300  | 4.45134400  |
| C  | 12.88686700 | 7.88423200  | 4.85897700 | H  | 7.03829400  | 9.87202000  | 4.10322300  |
| C  | 15.39512900 | 7.60427100  | 3.60669700 | C  | 8.92723100  | 3.08483400  | 0.77158300  |
| H  | 16.35428000 | 7.44768500  | 3.12011100 | H  | 9.39017100  | 3.35938800  | -0.17221400 |
| C  | 12.92035500 | 1.54081400  | 6.93597900 | C  | 7.65895200  | 7.78455000  | 4.27466600  |
| H  | 13.36313000 | 0.56480900  | 6.75450700 | C  | 5.16463100  | 7.41063000  | 5.53038200  |
| C  | 12.36791400 | 1.89000000  | 8.18418300 | H  | 4.21275100  | 7.21813700  | 6.01835900  |
| H  | 12.36352100 | 1.17335900  | 9.00520400 | C  | 7.86640100  | 1.44261000  | 2.19967500  |
| C  | 10.92505100 | 5.83888900  | 8.71830800 | H  | 7.46027300  | 0.45087100  | 2.38156800  |
| H  | 11.71495400 | 5.60890100  | 9.45234300 | C  | 8.40684100  | 1.81111800  | 0.95177600  |
| H  | 9.98518700  | 5.39584700  | 9.09282400 | H  | 8.43911000  | 1.09439200  | 0.13144900  |
| C  | 11.35635700 | 9.19948300  | 6.15363800 | C  | 9.69938000  | 5.81129200  | 0.41499500  |
| H  | 11.25576900 | 10.05998100 | 5.46593400 | H  | 8.91989900  | 5.54991000  | -0.31966600 |
| H  | 12.16501200 | 9.45854100  | 6.86202900 | H  | 10.65627200 | 5.40476900  | 0.04213400  |
| C  | 8.47344900  | 7.39302600  | 7.83039300 | C  | 9.13681500  | 9.15572100  | 2.97679300  |
| H  | 7.82299400  | 7.67657800  | 7.00067100 | H  | 9.20407000  | 10.02037200 | 3.66334800  |
| H  | 8.20513800  | 7.98151600  | 8.72441400 | H  | 8.31860300  | 9.38224500  | 2.26823300  |
| H  | 8.33745700  | 6.32496500  | 8.02435200 | C  | 12.08774800 | 7.45948800  | 1.30350700  |
| C  | 10.02269000 | 9.03422600  | 6.89013300 | H  | 12.72591500 | 7.76788200  | 2.13389900  |
| H  | 9.19573000  | 9.14688100  | 6.17963700 | H  | 12.33458000 | 8.05727200  | 0.40946300  |
| H  | 9.90960300  | 9.79449100  | 7.68225600 | H  | 12.26433700 | 6.39723100  | 1.11045600  |

|   |             |            |             |   |             |            |            |
|---|-------------|------------|-------------|---|-------------|------------|------------|
| C | 10.47576700 | 9.04128200 | 2.24025000  | C | 15.44181800 | 7.56618800 | 3.60153900 |
| H | 11.29787800 | 9.18700200 | 2.95037000  | H | 16.39656200 | 7.39155400 | 3.11244900 |
| H | 10.55913700 | 9.80429600 | 1.44708600  | C | 12.75908200 | 1.52852800 | 6.90922500 |
| C | 9.76268800  | 7.33723600 | 0.54462600  | H | 13.17956200 | 0.54181800 | 6.73260500 |
| H | 10.11853100 | 7.81829200 | -0.38270200 | C | 12.18026400 | 1.88373400 | 8.14409200 |
| H | 8.76362000  | 7.71479900 | 0.79012500  | H | 12.13125700 | 1.16079500 | 8.95808800 |

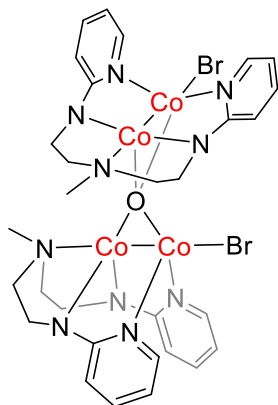

**3-TPSS (0 7)**

E = -2399.73524363 au

|    |             |            |            |    |             |            |            |
|----|-------------|------------|------------|----|-------------|------------|------------|
| Br | 12.78871600 | 3.77799700 | 2.41988500 | H  | 9.26424600  | 9.25732800 | 6.14773800 |
| Co | 12.19114500 | 4.97061400 | 4.46541000 | H  | 9.98575200  | 9.86230700 | 7.66406600 |
| Co | 10.56051300 | 6.50316500 | 5.93789600 | C  | 10.78983400 | 7.39635100 | 8.54630400 |
| O  | 10.28979300 | 5.27255100 | 4.56131000 | H  | 10.42417700 | 7.87363000 | 9.47181300 |
| N  | 12.25187600 | 3.72939800 | 6.04933900 | H  | 11.78985800 | 7.77737700 | 8.31041200 |
| N  | 13.32944300 | 6.65556100 | 4.37152500 | Br | 7.85650500  | 3.56625100 | 6.71713600 |
| N  | 11.21147300 | 5.36687800 | 7.34330200 | Co | 8.46489800  | 4.78031500 | 4.68836900 |
| C  | 11.68071100 | 4.09739100 | 7.25062800 | Co | 10.07536000 | 6.43074900 | 3.14809000 |
| C  | 12.75638300 | 2.48121700 | 5.89589900 | N  | 8.44833200  | 3.59551200 | 3.06046200 |
| H  | 13.16109200 | 2.27183100 | 4.90686500 | N  | 7.32284400  | 6.46812100 | 4.78482400 |
| N  | 11.72661100 | 7.98567500 | 5.44457500 | N  | 9.39855100  | 5.29724900 | 1.76401900 |
| C  | 14.53840600 | 6.52185300 | 3.76950100 | C  | 8.96585200  | 4.01266500 | 1.84951300 |
| H  | 14.74982900 | 5.52119500 | 3.39679700 | C  | 7.99955400  | 2.32363800 | 3.19785000 |
| N  | 9.89676900  | 7.73104800 | 7.39937300 | H  | 7.63520600  | 2.07572800 | 4.19392500 |
| C  | 15.06465800 | 8.83653200 | 4.07955500 | N  | 8.93922000  | 7.87060500 | 3.80029200 |
| H  | 15.73101700 | 9.69145300 | 3.96440000 | C  | 6.10409600  | 6.30320600 | 5.35763100 |
| C  | 13.83283400 | 9.00483500 | 4.69723700 | H  | 5.89579700  | 5.28830800 | 5.69170200 |
| H  | 13.53767400 | 9.98591900 | 5.05934800 | N  | 10.62511900 | 7.68449000 | 1.71401800 |
| C  | 11.64185600 | 3.15048800 | 8.31764800 | C  | 5.55638400  | 8.61917600 | 5.11743700 |
| H  | 11.14699900 | 3.41333100 | 9.24841000 | H  | 4.88030800  | 9.46407800 | 5.24884500 |
| C  | 12.94079700 | 7.89434000 | 4.85638600 | C  | 6.80040000  | 8.82087400 | 4.53386100 |
|    |             |            |            | H  | 7.09302300  | 9.81974700 | 4.22265000 |

|   |             |            |             |    |             |            |            |
|---|-------------|------------|-------------|----|-------------|------------|------------|
| C | 8.99099800  | 3.09567200 | 0.75613500  | Co | 10.40353300 | 6.15456500 | 6.02251200 |
| H | 9.43487700  | 3.40161600 | -0.18726500 | O  | 10.26571600 | 5.14362800 | 4.51008700 |
| C | 7.70954600  | 7.72642400 | 4.35625100  | N  | 12.30464800 | 3.51039500 | 6.04231900 |
| C | 5.18385300  | 7.33029800 | 5.54300200  | N  | 13.16058200 | 6.35728700 | 4.37585800 |
| H | 4.22200700  | 7.12778000 | 6.00672200  | N  | 11.42808300 | 5.22497500 | 7.37238600 |
| C | 7.99471100  | 1.39586200 | 2.16168100  | C  | 11.97752700 | 3.98950900 | 7.29890600 |
| H | 7.61764500  | 0.39007600 | 2.32841900  | C  | 12.83674500 | 2.26954200 | 5.91050100 |
| C | 8.50694300  | 1.80501600 | 0.91471700  | H  | 13.04472800 | 1.97169500 | 4.88335800 |
| H | 8.54729700  | 1.10710500 | 0.07862300  | N  | 11.34081200 | 7.67044800 | 5.11023600 |
| C | 9.65148200  | 5.84692900 | 0.43043000  | C  | 14.44388200 | 6.24523500 | 3.95768200 |
| H | 8.84112900  | 5.58352800 | -0.26924400 | H  | 14.73590900 | 5.24113100 | 3.65486900 |
| H | 10.59605600 | 5.47460100 | -0.00526900 | N  | 9.89035100  | 7.42523400 | 7.45058200 |
| C | 9.17374500  | 9.14229500 | 3.10433700  | C  | 14.85020600 | 8.58110600 | 4.25850800 |
| H | 9.26648200  | 9.99746900 | 3.79976600  | H  | 15.49437800 | 9.45858700 | 4.20647100 |
| H | 8.32338400  | 9.37233000 | 2.43684500  | C  | 13.52985300 | 8.72323900 | 4.67544800 |
| C | 12.03860900 | 7.45976700 | 1.29466000  | H  | 13.15016100 | 9.71182200 | 4.91626800 |
| H | 12.69995600 | 7.74927600 | 2.11372900  | C  | 12.25447200 | 3.17180400 | 8.43871200 |
| H | 12.26919400 | 8.06530600 | 0.40210400  | H  | 11.98660500 | 3.52787900 | 9.42994300 |
| H | 12.19647000 | 6.39779300 | 1.08569100  | C  | 12.66456500 | 7.58842500 | 4.74094800 |
| C | 10.47227900 | 9.04656000 | 2.30206000  | C  | 15.33306600 | 7.31501400 | 3.88913000 |
| H | 11.32946300 | 9.17624600 | 2.97217500  | H  | 16.35370600 | 7.15994000 | 3.54943200 |
| H | 10.51705800 | 9.82305400 | 1.51960200  | C  | 13.11471000 | 1.43436200 | 6.98631900 |
| C | 9.68998100  | 7.37119000 | 0.59402700  | H  | 13.54269000 | 0.44911700 | 6.82076800 |
| H | 10.00889300 | 7.88194800 | -0.33059200 | C  | 12.81486000 | 1.91320100 | 8.27798000 |
| H | 8.69534900  | 7.72751800 | 0.88464000  | H  | 13.00379400 | 1.29219900 | 9.15353700 |

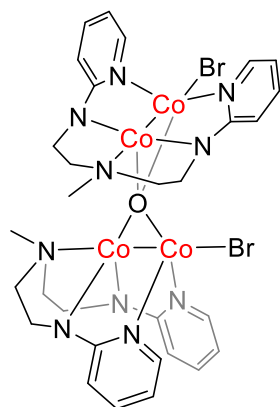

**3-TPSS (0 9)**

E = -2399.73275233 au

|    |             |            |            |
|----|-------------|------------|------------|
| Br | 12.80837900 | 3.55115500 | 2.32083700 |
| Co | 12.09252900 | 4.61468400 | 4.37461800 |

|   |             |            |            |
|---|-------------|------------|------------|
| H | 8.87017100  | 8.65939200 | 6.12566200 |
| H | 9.69053100  | 9.56611900 | 7.42935300 |
| C | 11.00024100 | 7.33327600 | 8.44852900 |

|    |             |             |             |
|----|-------------|-------------|-------------|
| H  | 10.73016700 | 7.86314600  | 9.37730300  |
| H  | 11.88565200 | 7.80347500  | 8.00704900  |
| Br | 7.82965400  | 3.87369300  | 6.69523400  |
| Co | 8.30575000  | 5.10909200  | 4.63522200  |
| Co | 10.09593200 | 6.61050800  | 3.33004600  |
| N  | 8.24583600  | 3.85971400  | 3.08393000  |
| N  | 7.16283600  | 6.76081400  | 4.71292400  |
| N  | 9.40694600  | 5.50014800  | 1.89021800  |
| C  | 8.94745600  | 4.22157200  | 1.95452600  |
| C  | 7.72497600  | 2.61594700  | 3.19793200  |
| H  | 7.22419200  | 2.41535400  | 4.14370800  |
| N  | 8.71683700  | 8.09063500  | 3.58191100  |
| C  | 5.94931900  | 6.60843100  | 5.30713300  |
| H  | 5.79709800  | 5.63777400  | 5.77789600  |
| N  | 10.72714500 | 7.87524300  | 1.81369000  |
| C  | 5.26673000  | 8.82422600  | 4.71169300  |
| H  | 4.53175000  | 9.62945100  | 4.70367600  |
| C  | 6.49676600  | 9.01361900  | 4.10273200  |
| H  | 6.72366100  | 9.96212000  | 3.62297000  |
| C  | 9.10880700  | 3.26032800  | 0.91121900  |
| H  | 9.72119500  | 3.50231100  | 0.04776000  |
| C  | 7.48582400  | 7.97009900  | 4.10273400  |
| C  | 4.97251700  | 7.59519300  | 5.34098300  |
| H  | 4.02165000  | 7.40974400  | 5.83371900  |
| C  | 7.82237700  | 1.65711500  | 2.19515000  |
| H  | 7.37640700  | 0.67485100  | 2.32888000  |
| C  | 8.54243100  | 1.99925400  | 1.03316600  |
| H  | 8.68439000  | 1.26750600  | 0.23814100  |
| C  | 9.86768800  | 5.95639800  | 0.57691400  |
| H  | 9.16384300  | 5.64520800  | -0.21216000 |
| H  | 10.86060800 | 5.54939700  | 0.31505900  |
| C  | 9.00954500  | 9.32664500  | 2.86288700  |
| H  | 8.95752500  | 10.21936200 | 3.51622100  |
| H  | 8.27723300  | 9.50138400  | 2.05179300  |
| C  | 12.16786300 | 7.72283400  | 1.47581700  |
| H  | 12.77273700 | 8.11472400  | 2.29584100  |
| H  | 12.40579200 | 8.28140500  | 0.55413300  |
| H  | 12.40358600 | 6.66276000  | 1.33875800  |
| C  | 10.42980700 | 9.25193400  | 2.28043100  |

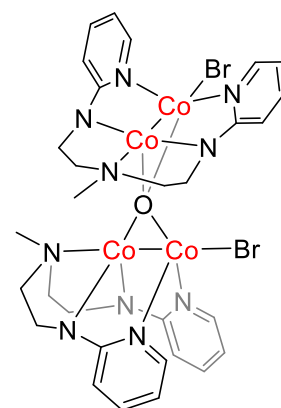

**3-TPSS (0 11)**

E = -2399.74425451 au

|    |             |             |            |
|----|-------------|-------------|------------|
| Br | 12.60188100 | 3.92576300  | 2.37983100 |
| Co | 12.13868200 | 5.09169400  | 4.46804300 |
| Co | 10.58053000 | 6.55750400  | 5.92688000 |
| O  | 10.17871000 | 5.22186900  | 4.60375400 |
| N  | 12.43416500 | 3.87135900  | 6.03450700 |
| N  | 13.29016100 | 6.77436900  | 4.43573400 |
| N  | 11.31561400 | 5.42640900  | 7.35707200 |
| C  | 11.89383100 | 4.20753700  | 7.26294200 |
| C  | 13.04655300 | 2.67506800  | 5.86450300 |
| H  | 13.41769300 | 2.49173300  | 4.85716200 |
| N  | 11.73918700 | 8.09038200  | 5.57541500 |
| C  | 14.50628900 | 6.62294900  | 3.84912000 |
| H  | 14.67301100 | 5.64511700  | 3.39883000 |
| N  | 9.77482100  | 7.76176900  | 7.44743600 |
| C  | 15.15443100 | 8.87010600  | 4.37206800 |
| H  | 15.87365500 | 9.68866000  | 4.34716300 |
| C  | 13.92072300 | 9.05530800  | 4.97999300 |
| H  | 13.66866800 | 10.01314900 | 5.42847200 |
| C  | 11.98643400 | 3.26477000  | 8.33288200 |
| H  | 11.52308600 | 3.49296600  | 9.28876200 |

---

|    |             |             |            |   |             |            |             |
|----|-------------|-------------|------------|---|-------------|------------|-------------|
| C  | 12.96458300 | 7.99145900  | 5.02019200 | C | 6.08315400  | 6.34879600 | 5.22911100  |
| C  | 15.46805800 | 7.62531500  | 3.78920700 | H | 5.79178800  | 5.34612400 | 5.53735300  |
| H  | 16.42210400 | 7.43961600  | 3.30261700 | N | 10.67269400 | 7.46714900 | 1.63134600  |
| C  | 13.18081800 | 1.73561300  | 6.88036300 | C | 5.71585900  | 8.70184600 | 5.02153500  |
| H  | 13.67835900 | 0.78818400  | 6.68990300 | H | 5.10115400  | 9.59273800 | 5.15025800  |
| C  | 12.62474700 | 2.04882600  | 8.13769000 | C | 6.99234700  | 8.82158400 | 4.48607700  |
| H  | 12.67932500 | 1.33205400  | 8.95690700 | H | 7.36953000  | 9.80312900 | 4.21349900  |
| C  | 10.85563600 | 5.88161100  | 8.66932200 | C | 8.59309000  | 3.07112900 | 0.65420600  |
| H  | 11.60255200 | 5.68047200  | 9.45641700 | H | 8.96255200  | 3.39332900 | -0.31556900 |
| H  | 9.91901400  | 5.37694500  | 8.96557400 | C | 7.82166100  | 7.66565500 | 4.30961800  |
| C  | 11.40032700 | 9.30046700  | 6.31840000 | C | 5.23332900  | 7.43711000 | 5.40393500  |
| H  | 11.38316300 | 10.20076500 | 5.67593500 | H | 4.24360300  | 7.29818200 | 5.83085700  |
| H  | 12.15051500 | 9.49734500  | 7.10675700 | C | 7.62962600  | 1.36600900 | 2.07923700  |
| C  | 8.35022000  | 7.54023900  | 7.79893300 | H | 7.21625300  | 0.37382100 | 2.24093900  |
| H  | 7.72208000  | 7.85530700  | 6.96228600 | C | 8.05775700  | 1.80025700 | 0.80888200  |
| H  | 8.07572800  | 8.12130800  | 8.69706500 | H | 7.98922100  | 1.13616800 | -0.05269700 |
| H  | 8.17995300  | 6.47386200  | 7.97879400 | C | 9.43411600  | 5.77089900 | 0.37961700  |
| C  | 9.99893700  | 9.14382400  | 6.94224800 | H | 8.56012800  | 5.61008000 | -0.27378900 |
| H  | 9.23116400  | 9.30780600  | 6.17640000 | H | 10.30905100 | 5.32477000 | -0.12770200 |
| H  | 9.85294400  | 9.89160300  | 7.74251000 | C | 9.40759600  | 9.00056700 | 3.12188200  |
| C  | 10.66294000 | 7.40280700  | 8.59288800 | H | 9.59249700  | 9.81947600 | 3.84020100  |
| H  | 10.25056200 | 7.80382700  | 9.53512700 | H | 8.56863600  | 9.32560700 | 2.48081200  |
| H  | 11.64109300 | 7.86200200  | 8.41125500 | C | 12.02984800 | 7.20470500 | 1.07486100  |
| Br | 7.68702100  | 3.54614100  | 6.68550600 | H | 12.76139100 | 7.27644700 | 1.88274500  |
| Co | 8.36231800  | 4.67566000  | 4.63897100 | H | 12.25775300 | 7.94652400 | 0.29095200  |
| Co | 10.12021000 | 6.23499800  | 3.07514000 | H | 12.07205100 | 6.19344500 | 0.66710600  |
| N  | 8.26715500  | 3.50491800  | 3.01123300 | C | 10.66938600 | 8.81050500 | 2.28370900  |
| N  | 7.32817600  | 6.43481200  | 4.69910800 | H | 11.55122400 | 8.82503800 | 2.93352800  |
| N  | 9.21608700  | 5.20135100  | 1.71051800 | H | 10.77301100 | 9.61020100 | 1.53049500  |
| C  | 8.71204700  | 3.94455800  | 1.77884000 | C | 9.63049400  | 7.27749800 | 0.57717100  |
| C  | 7.76232600  | 2.25353600  | 3.14165300 | H | 9.92802100  | 7.78676200 | -0.35499500 |
| H  | 7.45820800  | 1.98995700  | 4.15395600 | H | 8.69753900  | 7.71415000 | 0.94978800  |
| N  | 9.07834200  | 7.73313500  | 3.78774800 |   |             |            |             |



---

## 5. References

1. G. M. Sheldrick, *Acta Crystallogr. Sect. C*, 2015, **71**, 3–8.
2. O. V. Dolomanov, L. J. Bourhis, R. J. Gildea, J. A. K. Howard and H. Puschmann, *J. Appl. Crystallogr.*, 2009, **42**, 339–341.
3. M. J. Frisch, G. W. Trucks, H. B. Schlegel, G. E. Scuseria, M. A. Robb, J. R. Cheeseman, G. Scalmani, V. Barone, G. A. Petersson, H. Na-katsuji, X. Li, M. Caricato, A. V. Marenich, J. Bloino, B. G. Janesko, R. Gomperts, B. Mennucci, H. P. Hratchian, J. V. Ortiz, A. F. Izmaylov, J. L. Sonnenberg, D. Williams-Young, F. Ding, F. Lipparini, F. Egidi, J. Goings, B. Peng, A. Petrone, T. Henderson, D. Ranasinghe, V. G. Zakrzewski, J. Gao, N. Rega, G. Zheng, W. Liang, M. Hada, M. Ehara, K. Toyota, R. Fukuda, J. Hasegawa, M. Ishida, T. Nakajima, Y. Honda, O. Kitao, H. Nakai, T. Vreven, K. Throssell, J. A. Montgomery, Jr.; J. E. Peralta, F. Ogliaro, M. J. Bearpark, J. J. Heyd, E. N. Brothers, K. N. Kudin, V. N. Staroverov, T. A. Keith, R. Kobayashi, J. Normand, K. Raghavachari, A. P. Rendell, J. C. Burant, S. S. Iyengar, J. Tomasi, M. Cossi, J. M. Millam, M. Klene, C. Adamo, R. Cammi, J. W. Ochterski, R. L. Martin, K. Morokuma, O. Farkas, J. B. Foresman and D. J. Fox, Gaussian16, Revision A.03, Gaussian, Wallingford, CT, USA, 2016.
4. J. Tao, J. P. Perdew, V. N. Staroverov and G. E. Scuseria, *Phys. Rev. Lett.*, 2003, **91**, 146401.
5. (a) G. A. Petersson, A. Bennett, T. G. Tensfeldt, M. A. Allaham, W. A. Shirley and J. Mantzaris, *J. Chem. Phys.*, 1988, **89**, 2193–221; (b) V. A. Rassolov, J. A. Pople, M. A. Ratner and T. L. Windus, *J. Chem. Phys.*, 1998, **109**, 1223–1229.
6. P. J. Hay and W. R. Wadt, *J. Chem. Phys.*, 1985, **82**, 299–310.
7. S. Grimme, S. Ehrlich and Goerigk, *L. J. Comput. Chem.* 2011, **32**, 1456-1465.
8. E. D. Glendenning, A. E. Reed, J. E. Carpenter and F. Weinhold, NBO Version 3.1. Gaussian Inc., Pittsburgh, 2003.
9. (a) R. Krishnan, J. S. Binkley, R. Seeger and J. A. Pople, *J. Chem. Phys.*, 1980, **72**, 650–654; (b) M. J. Frisch, J. A. Pople and J. S. Binkley, *J. Chem. Phys.*, 1984, **80**, 3265–3269.
10. (a) J. X. Zhang, F. K. Sheong and Z. Lin, *Chem. –Eur. J.*, 2018, **24**, 9639–9650; (b) J. X. Zhang, F. K. Sheong and Z. Lin, *WIREs Comput. Mol. Sci.*, 2020, **10**, e1469.
11. T. Lu and F. J. Chen, *Comput. Chem.*, 2012, **33**, 580–592.
12. A. V. Marenich, C. J. Cramer and D. G. Truhlar, *J. Phys. Chem. B* 2009, **113**, 6378-6396
13. W. Humphrey, A. Dalke and K. Schulten, *J. Mol. Graph.*, 1996, **14**, 33–38.

- 
14. (a) A. D. Becke, *J. Chem. Phys.*, 1993, **98**, 5648–5652; (b) P. J. Stephens, F. J. Devlin, C. F. Chabalowski and M. J. Frisch, *J. Phys.Chem.*, 1994, **98**, 11623–11627.
15. Becke, A. D. *Phys. Rev. A*, 1988, **38**, 3098-3100.
16. C. Adamo and V. Barone . *J. Chem. Phys.* 1999, **110**, 6158-6170.
